# Supplementary material
Source: PubMed Central journal article supplement (PMC10869952)
Supplement: NIHMS1958252-supplement-Supplementary_materia.pdf [file NIHMS1958252-supplement-Supplementary_materia.pdf]

# Excess risk of cardiovascular events in patients in the United States vs. Japan with chronic kidney disease is mediated mainly by left ventricular structure and function

Subtitle: Excess CVD Risk and LV Structure and Function

Takahiro Imaizumi<sup>1,2,3,4</sup>, Naohiko Fujii<sup>5</sup>, Takayuki Hamano<sup>6,7,\*</sup>, Wei Yang<sup>1,2</sup>, Masataka Taguri<sup>8</sup>, Mayank Kansal<sup>9</sup>, Rupal Mehta<sup>10,11</sup>, Tariq Shafi<sup>12</sup>, Jonathan Taliercio<sup>13</sup>, Alan Go<sup>14</sup>, Panduranga Rao<sup>15</sup>, L. Lee Hamm<sup>16</sup>, Rajat Deo<sup>17</sup>, Shoichi Maruyama<sup>4</sup>, Masafumi Fukagawa<sup>18</sup>, Harold I. Feldman<sup>1,2</sup>, and the CRIC Study Investigators<sup>19</sup>

<sup>1</sup>Department of Biostatistics, Epidemiology and Informatics, Perelman School of Medicine, University of Pennsylvania, Philadelphia, Pennsylvania, USA.

<sup>2</sup>Center for Clinical Epidemiology and Biostatistics, University of Pennsylvania, Philadelphia, Pennsylvania, USA.

<sup>3</sup>Department of Advanced Medicine, Nagoya University Hospital, Nagoya, Aichi, Japan

<sup>4</sup>Department of Nephrology, Nagoya University Graduate School of Medicine, Nagoya, Aichi, Japan

<sup>5</sup>Medical and Research Center for Nephrology and Transplantation, Hyogo Prefectural Nishinomiya Hospital, Nishinomiya, Hyogo, Japan.

<sup>6</sup>Department of Nephrology, Nagoya City University Graduate School of Medical Sciences, Nagoya, Aichi, Japan

<sup>7</sup>Department of Nephrology, Osaka University Graduate School of Medicine, Suita, Osaka, Japan.

<sup>8</sup>Department of Health Data Science, Tokyo Medical University, Tokyo, Japan.

<sup>9</sup>Department of Medicine, School of Medicine, University of Illinois, Chicago, Illinois, USA.

<sup>10</sup>Division of Nephrology and Hypertension, Department of Medicine and Center for Translational Metabolism and Health, Institute for Public Health and Medicine, Chicago, Illinois, USA.

<sup>11</sup>Department of Preventive Medicine Feinberg School of Medicine, Northwestern University, Chicago, Illinois, USA.

<sup>12</sup>School of Medicine, Johns Hopkins University, Baltimore, Maryland, USA.

<sup>13</sup>Department of Nephrology and Hypertension, Cleveland Clinic, Cleveland, Ohio, USA.

<sup>14</sup>Departments of Epidemiology, Biostatistics and Medicine, University of California at San Francisco, San Francisco, California, USA.

<sup>15</sup>Department of Internal Medicine, Division of Nephrology, University of Michigan Health System, Ann Arbor, Michigan, USA.

<sup>16</sup>Department of Medicine, Tulane University School of Medicine, New Orleans, Louisiana, USA.

<sup>17</sup>Departments of Medicine, Perelman School of Medicine at the University of Pennsylvania, Philadelphia, Pennsylvania, USA.

<sup>18</sup>Department of Internal Medicine, Division of Nephrology, Endocrinology and Metabolism, Tokai University School of Medicine, Isehara, Kanagawa, Japan.

<sup>19</sup>Collaborators: Lawrence J. Appel, Jing Chen, Debbie L Cohen, James P. Lash, Robert G. Nelson, Panduranga S. Rao, Mahboob Rahman, Vallabh O. Shah, Mark L. Unruh

**-Supplementary material-**

## Supplementary Methods

Definition of echocardiographic parameters

Definition of outcome events in both cohorts

Definition of covariates

Biomarker harmonization between the CRIC and CKD-JAC studies

Mediation analysis

## Supplementary Tables

**Supplementary Table S1.** Baseline characteristics of those with or without echocardiography in the Chronic Kidney Disease Japan Cohort (CKD-JAC) study.

**Supplementary Table S2.** Factors associated with left ventricular mass index (LVMI) in the combined cohort.

**Supplementary Table S3.** Factors associated with left ventricular ejection fraction (LVEF) in the combined cohort

**Supplementary Table S4.** Description of outcome events.

**Supplementary Table S5.** Factors associated with the incidence of cardiovascular disease (CVD) events.

**Supplementary Table S6.** Association of left ventricular indices with the incidence of atherosclerotic cardiovascular disease (ASCVD) events.

**Supplementary Table S7.** Association of left ventricular indices with the incidence of congestive heart failure (CHF).

**Supplementary Table S8.** Association of left ventricular indices with the incidence of all-cause death.

**Supplementary Table S9.** Association of left ventricular indices with the incidence of kidney failure.

**Supplementary Table S10.** Association of left atrial dimension (LAD: /10 mm) with subsequent cardiovascular disease (CVD) events.

**Supplementary Table S11.** Subgroup analyses of the association between region and outcomes (no cardiovascular disease [CVD] history and estimated glomerular filtration rate [eGFR] 20–60 mL/min/173 m<sup>2</sup>).

**Supplementary Table S12.** Proportion mediated of parameters associated with outcomes using mediation analysis.

## **Supplementary Figures**

**Supplementary Figure S1.** Causal diagram.

**Supplementary Figure S2.** Distribution of factors associated with increased left ventricular mass index (LVMI) compared among ethnic groups across levels of estimated glomerular filtration rate (eGFR).

**Supplementary Figure S3.** Association between body mass index (BMI) and asymmetric septal hypertrophy.

**Supplementary Figure S4.** Unadjusted and adjusted event-free survival of adverse events (Chronic Renal Insufficiency Cohort [CRIC] vs. Chronic Kidney Disease Japan Cohort [CKD-JAC]).

**Supplementary Figure S5.** Unadjusted and adjusted event-free survival of adverse events (4 different race-ethnic groups).

### Definition of echocardiographic parameters

LV mass (LVM) was calculated using 2-dimensional images of the LV short-axis muscle area and the apical LV length with Devereux's formula using LV internal end-diastolic diameter (LVEDD), interventricular septum thickness at end-diastole (IVSd), and posterior wall thickness in diastolic phase (PWd) as follows.<sup>S1,S2</sup>

$$\text{LVM (g)} = 0.8 \times \{1.04 \times [(\text{LVEDD} + \text{IVSd} + \text{PWd})^3 - \text{LVEDD}^3]\} + 0.6.$$

LVMI was calculated as LVM divided by height (m) to the power of 2.7, written as  $\text{m}^{2.7}$ . This indexation was originally proposed by de Simone et al.<sup>S3</sup> and was utilized in a multiethnic comparison of LVMI.<sup>S4</sup> We defined LVH as LVMI  $>50 \text{ g/m}^{2.7}$  in males and  $>47 \text{ g/m}^{2.7}$  in females based on previous research.<sup>S2</sup> Relative wall thickness (RWT) was calculated as IVSd plus PWd divided by the LVEDD, and we defined high RWT as  $\geq 0.45$ . LV geometry was categorized by LVMI and RWT as (1) normal (normal LVMI and RWT), (2) concentric remodeling (normal LVMI and high RWT), (3) eccentric hypertrophy (high LVMI and normal RWT), or (4) concentric hypertrophy (high LVMI and RWT). To assess the symmetry between IVSd and PWd, we also examined the septal-to-posterior wall thickness ratio. We defined asymmetric septal hypertrophy (ASH) as a septal-to-posterior wall thickness ratio of more than 1.3, which is a common feature in patients with advanced CKD.<sup>S5</sup> LV systolic function was assessed as EF  $\{([\text{end-diastolic volume}] - [\text{end-systolic volume}]) / [\text{end-systolic volume}]\} \times 100\%$ .

### Definition of outcome events in both cohorts

In the CRIC study, the following process was repeated every six months to confirm events. CRIC participants were asked about the occurrence of an outcome event and possible hospitalization, and then, inpatient medical records were selectively reviewed. For records where the hospital billing codes suggested a cardiovascular CRIC event of interest,

records were then collected at the clinical sites and stored centrally. Deidentified copies of the medical records were distributed to members of the CRIC Event Adjudication Committee, which ultimately provided the final determination regarding the occurrence of a CRIC clinical outcome event. Peripheral arterial disease data were abstracted by a nurse and not reviewed by two physicians. CVD outcome events were defined as follows.

- 1) Acute Myocardial Infarction (MI): MI occurring in the inpatient setting was defined by a combination of abnormalities of the electrocardiogram (ECG), elevations of cardiac enzymes and the presence of symptoms.
- 2) Hospitalization for CHF: CHF was recorded as an outcome event when hospitalization occurred for clinical symptoms of CHF in the setting of objective confirmatory evidence, including radiographs, evidence of pulmonary congestion/edema, physical examination, invasive hemodynamic monitoring or the use of inotropic support.
- 3) Peripheral Vascular Disease (PVD): A peripheral vascular event was documented when one of the following was present
  - PVD with resultant amputation
  - Peripheral surgical or percutaneous revascularization procedures such as arterial angioplasty and artery-artery bypass grafting.
- 4) Cerebrovascular event: Cerebrovascular events were categorized as follows:
  - Intraparenchymal hemorrhage
  - Subarachnoid hemorrhage
  - Large-vessel cerebral infarction
  - Cardioembolic cerebral infarction
  - Small-vessel cerebral infarction
  - Cerebral infarction not otherwise specified

5) Sudden Cardiac Death: Sudden cardiac death was ascertained via questionnaires that were administered to next of kin addressing the timing and location of death as well as the circumstances and symptoms just prior to death. Interviews took place as soon as possible upon the confirmation of participant death. Two physicians reviewed the questionnaire information and adjudicated the final determination of a sudden cardiac death event.

In the CKD-JAC study, on the other hand, once local investigators recognized a possible event occurrence, they submitted the report of a potential CVD event to the data center. The CVD event adjudication committee, which comprised three physicians, reviewed the anonymized event reports and provided the final decision on the events. CVD events were defined as follows.

- 1) Myocardial infarction: The diagnosis was based on specific changes in electrocardiograms, elevations in myocardial desensitization enzymes, and angiographic findings.
- 2) Sudden death: All of the following were met:
  - (1) Death within 1 hour after the onset of serious symptoms, or death confirmed by the last person seeing the patient as asymptomatic at the time of death.
  - (2) No evidence of any disease other than acute or chronic coronary artery disease that could have resulted in death.
  - (3) "Unexpected" death occurring in a person who was not resting at home, admitted to a hospital, or otherwise institutionalized because of illness within 24 hours before death.
- 3) Congestive heart failure: At least one of the following criteria was met.
  - (1) Heart failure not due to an acute event (due to a chronic event)
  - (2) Marked dyspnea

(3) Marked pulmonary edema on frontal chest X-ray

(4) Marked elevated BNP level (if measured)

(5) Strict in-out balance control was required.

4) Fatal arrhythmia: Deaths due to the following arrhythmia.

5) Cerebrovascular events were classified into the following three categories:

(1) Cerebral infarction

(2) Cerebral hemorrhage

(3) Subarachnoid hemorrhage

All of the following conditions had to be met as the basis for diagnosis.

(1) Recent onset with clear and objective findings of focal neurologic deficits.

(2) The finding has persisted for at least 24 hours.

(3) Neurological findings were not due to extracranial damage.

(4) CT or MRI or autopsy records within 3 weeks of onset of the disease showed that the cerebrovascular disease could be classified as cerebral hemorrhage, cerebral infarction, or subarachnoid hemorrhage.

6) Peripheral vascular disease: defined as any of the following

(1) Vascular intermittent claudication

(2) Unilateral loss or weakness of femoral arterial pulsation

(3) Unilateral loss or weakness of the dorsal foot artery and posterior carotid artery pulsation

(4) Bilateral loss or weakness of the dorsal foot artery and/or posterior carotid artery pulsation

(5) Ankle–brachial index (ABI) < 0.8

(6) Angiographic evidence of stenosis (>75% stenosis or collateral vessels)

(7) Leg gangrene or ulcer

7) Other fatal CVD event: Included aortic dissection and following arrhythmia

(1) Ventricular fibrillation

(2) Sustained ventricular tachycardia

(3) Torsades de pointes

(4) Cardiac arrest (due to atrioventricular block, sinus dysfunction syndrome, etc.)

Overall, the definitions of CVD events were similar between the two cohorts, with the exception of PVD and sudden death. Although the methods of collecting reports of possible events differed, both cohorts shared the adjudication of events by a third-party organization irrelevant to the study and analysis.

### **Definition of covariates**

Hypertension was defined as systolic blood pressure  $\geq 140$  mmHg, diastolic blood pressure  $\geq 90$  mmHg, or the use of any antihypertensive drugs, including diuretics. DM was defined as fasting blood glucose  $\geq 126$  mg/dL, random blood glucose  $\geq 200$  mg/dL, or the use of antidiabetic drugs. Regarding body mass index, we set different classifications for Asian people and other ethnic groups to account for racial diversity: for Asian participants, BMI  $< 18.5$  was underweight, 18.5–22.9 was normal weight, 23–24.9 was overweight, 25–29.9 was obese I, and BMI  $\geq 30$  was obese II or higher. For the other ethnic groups, BMI  $< 18.5$  was defined as underweight; 18.5–24.9, normal weight; 25–29.9, overweight; 30–34.9, obese I; and  $\geq 35$ , obese II or higher. A prior history of CVD consisted of four subcategories: coronary artery disease, CHF, PAD, and stroke. Those with any CVD had at least one CVD subcategory.

### **Biomarker harmonization between the CRIC and CKD-JAC studies**

In our collaboration project, we examined the differences in the medical history and



harmonized several biomarkers.<sup>S6</sup> Since LV measures are considered one of the major components of CKD mineral bone disease (CKD-MBD),<sup>S7</sup> we standardized MBD-related biomarkers, namely, phosphate and parathyroid hormone (PTH), by measuring the same values in different assays (Japanese and American) or using an equation for 25(OH) vitamin D. Serum phosphate was measured by a phosphomolybdate assay in the CRIC study and an enzymatic assay in the CKD-JAC study. Total PTH was measured by immunoradiometric assay (Scantibodies Laboratories, Santee, CA, USA) in the CRIC study, while intact PTH was measured by electrochemiluminescence immunoassay (Roche® Elecsys 2010 System, Roche Diagnostics). Intact fibroblast growth factor-23 (FGF23) was measured by a sandwich-antibody method that detects only the biologically active form of FGF23 (Kyowa Medex Inc, Tokyo, Japan). We randomly selected 897 samples from the CRIC study and securely transferred them to the same Japanese laboratory that measured intact FGF23. In the CRIC study, 25(OH) vitamin D was measured by liquid chromatography and mass spectrometry, while a conventional radioimmunoassay (DiaSorin® LIAISON 25OH Vitamin D Total Assay, Stillwater, MN) was used in the CKD-JAC study. In a previous study, we developed the conversion equations for serum phosphate and PTH into those measured in the CRIC study using Deming regression. Regarding 25(OH) vitamin D, we used the conversion equation for standardization.<sup>S8</sup> Detailed information on harmonization of the laboratory assays for these biomarkers is described elsewhere.<sup>S9</sup>

### **Mediation analysis**

The percentage mediation was estimated as follows:  $100\% \times (\text{hazard ratio [HR]} - \text{HRc}) / (\text{HR} - 1)$ , where “HRc” is the HR of CRIC vs. CKD-JAC after adding potential mediators to the model, and “HR” is the HR in a model without the mediators.<sup>S10</sup> The 95% confidence

intervals for the estimated percentage mediation were obtained using a 1000-iteration bootstrap resampling procedure.<sup>S11</sup> We adjusted for factors in Model 3 except for LVMI, EF, phosphate, iFGF23, and CRP. The combined potential mediating effect of multiple mediators was quantified using the same equation.

We also performed a secondary analysis using a method under the counterfactual framework approach, namely, we used the R package “CMAverse”, which accommodated multiple sequential mediators, adjusting for confounders preceding mediators (<https://bs1125.github.io/CMAverse/>). Multiple imputations for missing values were also available. The 95% confidence intervals for the estimated percentage mediation were obtained using a 1000-iteration bootstrap resampling procedure. In Model 3, we adjusted for all factors except for LVMI, EF, phosphate, iFGF23, and CRP.

In the original method proposed by Hafeman<sup>S10</sup>, the proportion mediated was estimated in the presence of only one mediator. However, we found that essentially the same formula was used in the R package CMAverse for multiple mediators under the rare disease assumption.<sup>S12</sup> Specifically, in CMAverse, the proportion mediated was estimated using the following formula:

$$HR^{NDE}(HR^{NIE} - 1)/(HR^{TE} - 1)$$

where  $HR^{NDE}$ ,  $HR^{NIE}$ , and  $HR^{TE}$  are the natural direct, natural indirect, and total effects in the hazard ratio scale, respectively. Because  $HR^{NDE} \times HR^{NIE} = HR^{TE}$ , we can rewrite the formula above as:

$$(HR^{TE} - HR^{NDE})/(HR^{TE} - 1).$$

This is the same as the formula proposed by Hafeman<sup>S10</sup> when there is no treatment-mediator interaction in the Cox model.

In the causal mediation framework, these mediators must conform to the following assumptions<sup>S12</sup>:

- (1) There are no unmeasured confounders of the association between the exposure and the outcome.
- (2) There are no unmeasured confounders of the association between the mediator and the outcome.
- (3) There are no unmeasured confounders of the association between the exposure and the mediator.
- (4) The confounders of the association between the mediator and the outcome are not affected by the exposure.

Here, we quantified unmeasured confounders by their E-value, defined as the minimum strength of association, on the risk ratio scale, that an unmeasured confounder would need to have with both the exposure and the outcome to fully explain away a specific exposure–outcome association, conditional on the measured covariates.<sup>S13</sup> For the fourth assumption, the best we could do was to make multivariable adjustments for measured confounders that would affect both the mediators and the outcomes (i.e., obesity and CVD history).

**[References]**

- S1. Devereux RB, Alonso DR, Lutas EM, et al. Echocardiographic assessment of left ventricular hypertrophy: Comparison to necropsy findings. *Am J Cardiol.* 1986;57(6):450–458.
- S2. Lang RM, Bierig M, Devereux RB, et al. Recommendations for chamber quantification: A report from the American Society of Echocardiography's guidelines and standards committee and the Chamber Quantification Writing Group, developed in conjunction with the European Association of Echocardiograph. *J Am Soc Echocardiogr.* 2005;18(12):1440–1463.
- S3. de Simone G, Devereux RB, Daniels SR, Koren MJ, Meyer RA, Laragh JH. Effect of growth on variability of left ventricular mass: Assessment of allometric signals in adults and children and their capacity to predict cardiovascular risk. *J Am Coll Cardiol.* 1995;25(5):1056–1062.
- S4. Akintoye E, Mahmoud K, Shokr M, et al. Racial/ethnic differences in the prognostic utility of left ventricular mass index for incident cardiovascular disease. *Clin Cardiol.* 2018;41(4):502–509.
- S5. Straumann E, Bertel O, Meyer B, et al. Symmetric and asymmetric left ventricular hypertrophy in patients with end-stage renal failure on long-term hemodialysis. *Clin Cardiol.* 1998;21(9):672–678.
- S6. Imaizumi T, Hamano T, Fujii N, et al. Cardiovascular disease history and  $\beta$ -blocker prescription patterns among Japanese and American patients with CKD: a cross-sectional study of the CRIC and CKD-JAC studies. *Hypertens Res.* 2021;44(6):700–710.
- S7. Hamano T, Sakaguchi Y, Fujii N, Isaka Y. Clinical features of CKD-MBD in Japan: cohort studies and registry. *Clin Exp Nephrol.* 2017;21(Suppl 1):9–20.

- S8. Janssen MJW, Wielders JPM, Bekker CC, et al. Multicenter comparison study of current methods to measure 25-hydroxyvitamin D in serum. *Steroids*. 2012;77(13):1366–1372.
- S9. Fujii N, Hamano T, Hsu JY, et al. A Comparative Study of Serum Phosphate and Related Parameters in CKD between the US and Japan. *Am J Nephrol*. 2022; 53(2–3): 226–239
- S10. Hafeman DM. “proportion explained”: A causal interpretation for standard measures of indirect effect? *Am J Epidemiol*. 2009;170(11):1443–1448.
- S11. Schomaker M, Heumann C. Bootstrap inference when using multiple imputation. *Stat Med*. 2018;37(14):2252–2266.
- S12. Van Der weele T, Vansteelandt S. Mediation analysis with multiple mediators. *Epidemiol Method*. 2014;2(1):95–115.
- S13. Van Der Weele TJ, Ding P. Sensitivity analysis in observational research: Introducing the E-Value. *Ann Intern Med*. 2017;167(4):268–274.

**Supplementary Table S1.** Baseline characteristics of those with or without echocardiography in the Chronic Kidney Disease Japan Cohort (CKD-JAC) study

|                                   | Total<br>(N = 2813) | Echo data<br>available<br>(n = 1171) | Echo data not<br>available<br>(n = 1642) | P value |
|-----------------------------------|---------------------|--------------------------------------|------------------------------------------|---------|
| Age, years                        | 60 (12)             | 61 (11)                              | 60 (12)                                  | <0.001* |
| Sex (male)                        | 1,753 (62)          | 748 (64)                             | 1,005 (61)                               | 0.15    |
| eGFR, mL/min/1.73m <sup>2</sup>   | 29.0 (12.3)         | 28.8 (12.6)                          | 29.2 (12.1)                              | 0.44    |
| UACR, mg/g                        | 490 (112–1316)      | 523 (139–1386)                       | 466 (97–1233)                            | 0.017*  |
| Diabetes                          | 1,057 (38)          | 494 (42)                             | 563 (34)                                 | <0.001* |
| Atrial fibrillation               | 60 (2)              | 29 (2)                               | 31 (2)                                   | 0.29    |
| BMI (kg/m <sup>2</sup> )          | 24 (4)              | 24 (4)                               | 23 (4)                                   | 0.19    |
| Smoking status (current smoker)   | 407 (17)            | 181 (17)                             | 226 (17)                                 | 0.74    |
| Alcohol consumption (yes)         | 464 (20)            | 213 (21)                             | 251 (19)                                 | 0.34    |
| Obesity category                  |                     |                                      |                                          | 0.20    |
| Underweight                       | 187 (7)             | 72 (6)                               | 115 (8)                                  |         |
| Normal                            | 1,023 (40)          | 453 (40)                             | 570 (41)                                 |         |
| Overweight                        | 523 (21)            | 243 (22)                             | 280 (20)                                 |         |
| Obese I                           | 655 (26)            | 285 (25)                             | 370 (26)                                 |         |
| Obese II or more                  | 140 (6)             | 71 (6)                               | 69 (5)                                   |         |
| Systolic BP (mmHg)                | 132 (19)            | 132 (18)                             | 131 (19)                                 | 0.41    |
| Diastolic BP (mmHg)               | 76 (12)             | 76 (12)                              | 76 (12)                                  | 0.40    |
| Medication                        |                     |                                      |                                          |         |
| Number of antihypertensive agents | 3 (2–4)             | 3 (2–4)                              | 3 (2–4)                                  | 0.089   |
| ACEi/ARB                          | 2,292 (81)          | 974 (83)                             | 1,318 (80)                               | 0.050*  |
| Beta Blockers                     | 573 (20)            | 237 (20)                             | 336 (20)                                 | 0.88    |
| Alpha blockers                    | 380 (14)            | 135 (12)                             | 245 (15)                                 | 0.009*  |
| Calcium channel blockers          | 1,561 (55)          | 672 (57)                             | 889 (54)                                 | 0.088   |
| Diuretics                         | 892 (32)            | 409 (35)                             | 483 (29)                                 | 0.002*  |
| Active vitamin D                  | 243 (9)             | 85 (7)                               | 158 (10)                                 | 0.028*  |
| Phosphate binders                 | 589 (21)            | 266 (23)                             | 323 (20)                                 | 0.050   |
| Antiplatelets                     | 1,116 (40)          | 511 (44)                             | 605 (37)                                 | <0.001* |
| Statins                           | 379 (13)            | 159 (14)                             | 220 (13)                                 | 0.89    |
| Any CVD history                   | 727 (26)            | 331 (28)                             | 396 (24)                                 | 0.013*  |
| CAD history                       | 329 (12)            | 178 (15)                             | 151 (9)                                  | <0.001* |
| CHF history                       | 151 (5)             | 69 (6)                               | 82 (5)                                   | 0.30    |
| Stroke history                    | 295 (10)            | 131 (11)                             | 164 (10)                                 | 0.31    |
| PAD history                       | 96 (3)              | 49 (4)                               | 47 (3)                                   | 0.057   |
| Locally measured laboratory data  |                     |                                      |                                          |         |
| Alb, g/dL                         | 4.0 (0.4)           | 4.0 (0.5)                            | 4.0 (0.4)                                | 0.014*  |
| Hb, g/dL                          | 12.1 (1.8)          | 12.2 (1.9)                           | 12.0 (1.8)                               | 0.095   |
| Total cholesterol, mg/dL          | 195 (44)            | 193 (44)                             | 196 (43)                                 | 0.091   |
| HbA1c (NGSP), %                   | 5.9 (0.9)           | 6.0 (0.9)                            | 5.9 (0.9)                                | 0.004*  |
| Corrected calcium, mg/dL          | 9.0 (0.5)           | 9.0 (0.5)                            | 9.1 (0.5)                                | 0.010*  |
| Phosphate, mg/dL                  | 3.5 (0.7)           | 3.5 (0.7)                            | 3.5 (0.7)                                | 0.53    |
| Total PTH, pg/mL                  | 78 (53–125)         | 78 (53–124)                          | 78 (54–125)                              | 0.95    |
| Intact FGF23, pg/mL               | 57 (40–91)          | 58 (42–93)                           | 55 (39–90)                               | 0.024*  |
| 25(OH)D, ng/mL                    | 15 (10–22)          | 15 (10–22)                           | 15 (9–21)                                | 0.11    |

Data are expressed as N (%) for categorical values and mean (S.D.) or median (interquartile range) for continuous values. \*P <0.05. Abbreviations: eGFR, estimated glomerular filtration rate; UACR, urinary albumin-creatinine ratio; BMI, body mass index; ACEi, angiotensin-converting enzyme inhibitor; ARB, angiotensin receptor blocker; CVD, cardiovascular disease; CAD, coronary artery disease; CHF, congestive heart failure; PAD, peripheral artery disease; NGSP, National Glycohemoglobin Standardization Program; PTH, parathyroid hormone; FGF, fibroblast growth factor.

**Supplementary Table S2.** Factors associated with left ventricular mass index (LVMI) in the combined cohort

|                                        | Model 1                   | Model 2                   | Model 3                   | Model 4                   |
|----------------------------------------|---------------------------|---------------------------|---------------------------|---------------------------|
|                                        | Coefficient<br>(95% CI)   | Coefficient<br>(95% CI)   | Coefficient<br>(95% CI)   | Coefficient<br>(95% CI)   |
| CRIC (vs. CKD-JAC)                     | <b>10.2 (8.85–11.5)</b>   | <b>7.61 (6.32–8.89)</b>   | <b>7.68 (6.26–9.10)</b>   | <b>6.55 (5.08–8.02)</b>   |
| Age (/10 years)                        | <b>1.00 (0.50–1.51)</b>   | <b>1.43 (0.95–1.90)</b>   | <b>1.59 (1.11–2.07)</b>   | <b>1.34 (0.87–1.82)</b>   |
| Male (vs. female)                      | <b>3.13 (2.08–4.19)</b>   | <b>3.97 (2.97–4.97)</b>   | <b>3.91 (2.89–4.93)</b>   | <b>3.82 (2.81–4.84)</b>   |
| Smoking status                         | 0.33 (-1.12–1.78)         | <b>1.78 (0.42–3.14)</b>   | <b>1.96 (0.60–3.31)</b>   | <b>1.86 (0.51–3.21)</b>   |
| eGFR (/10 ml/min/1.73 m <sup>2</sup> ) | <b>-0.63 (-1.02–0.25)</b> | <b>-0.48 (-0.84–0.12)</b> | -0.02 (-0.44–0.39)        | 0.16 (-0.26–0.58)         |
| ln(UACR)                               | <b>0.91 (0.61–1.20)</b>   | <b>0.98 (0.71–1.26)</b>   | <b>0.85 (0.57–1.12)</b>   | <b>0.84 (0.56–1.11)</b>   |
| Diabetes mellitus                      | <b>3.52 (2.47–4.58)</b>   | 0.27 (-0.75–1.29)         | 0.20 (-0.83–1.22)         | -0.14 (-1.18–0.89)        |
| CAD history                            | <b>3.62 (2.29–4.95)</b>   | <b>3.08 (1.84–4.33)</b>   | <b>3.21 (1.97–4.45)</b>   | <b>2.63 (1.38–3.88)</b>   |
| CHF history                            | <b>9.00 (7.15–10.8)</b>   | <b>8.84 (7.11–10.6)</b>   | <b>8.47 (6.74–10.2)</b>   | <b>7.88 (6.15–9.61)</b>   |
| Stroke history                         | -1.93 (-4.03–0.17)        | -0.88 (-2.84–1.09)        | -1.16 (-3.12–0.81)        | -1.34 (-3.30–0.61)        |
| PAD history                            | <b>2.59 (0.98–4.19)</b>   | <b>2.86 (1.36–4.36)</b>   | <b>2.86 (1.37–4.36)</b>   | <b>2.42 (0.94–3.91)</b>   |
| Atrial fibrillation                    | <b>4.83 (3.36–6.31)</b>   | <b>4.20 (2.82–5.58)</b>   | <b>4.08 (2.71–5.46)</b>   | <b>3.68 (2.31–5.04)</b>   |
| Hemoglobin, g/dL                       | <b>-0.88 (-1.20–0.56)</b> | <b>-1.30 (-1.60–1.00)</b> | <b>-1.09 (-1.41–0.78)</b> | <b>-1.11 (-1.42–0.80)</b> |
| Systolic blood pressure, mmHg          | <b>0.15 (0.13–0.18)</b>   | <b>0.13 (0.11–0.15)</b>   | <b>0.12 (0.10–0.15)</b>   | <b>0.11 (0.09–0.13)</b>   |
| ln(CRP)                                | <b>1.70 (1.30–2.10)</b>   | <b>0.40 (0.01–0.79)</b>   | <b>0.46 (0.07–0.85)</b>   | <b>0.44 (0.06–0.83)</b>   |
| Obesity category                       |                           |                           |                           |                           |
| Underweight                            |                           | <b>-5.68 (-8.85–2.51)</b> | <b>-5.68 (-8.83–2.52)</b> | <b>-5.56 (-8.70–2.43)</b> |
| Normal                                 |                           |                           |                           |                           |
| Overweight                             |                           | <b>4.91 (3.56–6.26)</b>   | <b>4.85 (3.50–6.20)</b>   | <b>4.59 (3.25–5.93)</b>   |
| Obese I                                |                           | <b>10.6 (9.17–12.0)</b>   | <b>10.3 (8.88–11.7)</b>   | <b>9.76 (8.37–11.1)</b>   |
| Obese II or more                       |                           | <b>17.7 (16.2–19.3)</b>   | <b>17.3 (15.7–18.8)</b>   | <b>16.5 (14.9–18.0)</b>   |
| Corrected calcium, mg/dL               |                           |                           | -0.62 (-1.66–0.43)        | -0.69 (-1.73–0.34)        |
| Phosphate, mg/dL                       |                           |                           | <b>1.09 (0.51–1.66)</b>   | <b>0.99 (0.42–1.56)</b>   |
| ln(total PTH)                          |                           |                           | <b>1.56 (0.73–2.38)</b>   | <b>1.36 (0.53–2.18)</b>   |
| ln(intact FGF23)                       |                           |                           | 0.86 (-0.10–1.83)         | 0.74 (-0.21–1.70)         |
| Active vitamin D supplementation       |                           |                           | <b>-2.75 (-4.63–0.86)</b> | <b>-2.90 (-4.77–1.03)</b> |
| ln(25(OH) vitamin D)                   |                           |                           | -0.64 (-1.41–0.13)        | -0.60 (-1.37–0.16)        |
| Antihypertensive medication            |                           |                           |                           |                           |
| β-blockers                             |                           |                           |                           | <b>2.86 (1.84–3.88)</b>   |
| Calcium channel blockers               |                           |                           |                           | <b>1.95 (0.98–2.92)</b>   |
| ACEi/ARB                               |                           |                           |                           | -0.70 (-1.76–0.36)        |
| Diuretics                              |                           |                           |                           | <b>1.67 (0.65–2.70)</b>   |

Emboldened values were statistically significant ( $P < 0.05$ )

CVD, cardiovascular disease; LVMI, left ventricular mass index; LVH, left ventricular hypertrophy; UACR, urinary albumin-creatinine ratio; CRP, C-reactive protein; PTH, parathyroid hormone; FGF, fibroblast growth factor; ACEi, angiotensin-converting enzyme inhibitor; ARB, angiotensin receptor blocker.

**Supplementary Table S3.** Factors associated with left ventricular ejection fraction (LVEF) in the combined cohort

|                                        | Model 1                   | Model 2                   | Model 3                   | Model 4                   |
|----------------------------------------|---------------------------|---------------------------|---------------------------|---------------------------|
|                                        | Coefficient<br>(95% CI)   | Coefficient<br>(95% CI)   | Coefficient<br>(95% CI)   | Coefficient<br>(95% CI)   |
| CRIC (vs. CKD-JAC)                     | <b>-10.4 (-11.1–9.69)</b> | <b>-10.5 (-11.2–9.73)</b> | <b>-10.9 (-11.7–10.1)</b> | <b>-10.4 (-11.3–9.60)</b> |
| Age (/10 years)                        | <b>0.74 (0.47–1.01)</b>   | <b>0.74 (0.47–1.01)</b>   | <b>0.74 (0.46–1.01)</b>   | <b>0.65 (0.37–0.92)</b>   |
| Male (vs. female)                      | <b>-2.38 (-2.94–1.82)</b> | <b>-2.41 (-2.98–1.85)</b> | <b>-2.27 (-2.85–1.69)</b> | <b>-2.41 (-2.99–1.83)</b> |
| Smoking status                         | 0.49 (-0.29–1.27)         | 0.56 (-0.22–1.34)         | 0.56 (-0.23–1.35)         | 0.60 (-0.19–1.39)         |
| eGFR (/10 ml/min/1.73 m <sup>2</sup> ) | 0.06 (-0.14–0.26)         | 0.06 (-0.15–0.26)         | 0.09 (-0.14–0.33)         | 0.12 (-0.12–0.36)         |
| ln(UACR)                               | -0.10 (-0.26–0.05)        | -0.11 (-0.26–0.05)        | -0.08 (-0.23–0.08)        | -0.15 (-0.31–0.00)        |
| Diabetes mellitus                      | 0.01 (-0.54–0.57)         | -0.10 (-0.67–0.47)        | -0.12 (-0.70–0.46)        | -0.12 (-0.70–0.46)        |
| CAD history                            | <b>-3.35 (-4.05–2.64)</b> | <b>-3.37 (-4.07–2.66)</b> | <b>-3.39 (-4.09–2.68)</b> | <b>-3.48 (-4.19–2.76)</b> |
| CHF history                            | <b>-6.74 (-7.71–5.77)</b> | <b>-6.74 (-7.71–5.77)</b> | <b>-6.75 (-7.73–5.78)</b> | <b>-6.51 (-7.49–5.53)</b> |
| Stroke history                         | -0.15 (-1.25–0.96)        | -0.11 (-1.21–1.00)        | -0.15 (-1.26–0.97)        | -0.16 (-1.27–0.95)        |
| PAD history                            | 0.25 (-0.60–1.09)         | 0.23 (-0.61–1.08)         | 0.23 (-0.62–1.07)         | 0.10 (-0.75–0.94)         |
| Atrial fibrillation                    | <b>-1.32 (-2.09–0.55)</b> | <b>-1.34 (-2.11–0.57)</b> | <b>-1.31 (-2.08–0.54)</b> | <b>-1.38 (-2.14–0.61)</b> |
| Hemoglobin, g/dL                       | -0.02 (-0.19–0.14)        | -0.05 (-0.22–0.12)        | -0.08 (-0.26–0.10)        | -0.08 (-0.26–0.10)        |
| Systolic blood pressure, mmHg          | -0.01 (-0.02–0.01)        | -0.01 (-0.02–0.01)        | -0.01 (-0.02–0.01)        | -0.01 (-0.02–0.00)        |
| ln(CRP)                                | <b>-0.47 (-0.68–0.25)</b> | <b>-0.50 (-0.72–0.28)</b> | <b>-0.49 (-0.72–0.27)</b> | <b>-0.48 (-0.71–0.26)</b> |
| Obesity category                       |                           |                           |                           |                           |
| Underweight                            |                           | -0.45 (-2.30–1.40)        | -0.48 (-2.32–1.37)        | -0.27 (-2.11–1.57)        |
| Normal                                 |                           |                           |                           |                           |
| Overweight                             |                           | 0.22 (-0.55–0.98)         | 0.23 (-0.54–0.99)         | 0.16 (-0.60–0.92)         |
| Obese I                                |                           | 0.90 (0.12–1.68)          | 0.97 (0.18–1.75)          | 0.76 (-0.02–1.55)         |
| Obese II or more                       |                           | 0.36 (-0.51–1.23)         | 0.51 (-0.37–1.38)         | 0.23 (-0.66–1.11)         |
| Corrected calcium, mg/dL               |                           |                           | 0.57 (-0.02–1.17)         | 0.50 (-0.09–1.08)         |
| Phosphate, mg/dL                       |                           |                           | 0.06 (-0.26–0.38)         | 0.08 (-0.24–0.40)         |
| ln(total PTH)                          |                           |                           | -0.30 (-0.77–0.17)        | -0.27 (-0.74–0.19)        |
| ln(intact FGF23)                       |                           |                           | 0.30 (-0.30–0.91)         | 0.25 (-0.34–0.84)         |
| Active vitamin D supplementation       |                           |                           | <b>1.12 (0.07–2.18)</b>   | 1.05 (-0.01–2.10)         |
| ln(25(OH) vitamin D)                   |                           |                           | 0.23 (-0.21–0.66)         | 0.18 (-0.25–0.61)         |
| Antihypertensive medication            |                           |                           |                           |                           |
| β-blockers                             |                           |                           |                           | 0.21 (-0.36–0.78)         |
| Calcium channel blockers               |                           |                           |                           | <b>1.80 (1.25–2.36)</b>   |
| ACEi/ARB                               |                           |                           |                           | <b>1.03 (0.43–1.62)</b>   |
| Diuretics                              |                           |                           |                           | <b>-0.77 (-1.36–0.18)</b> |

Emboldened values were statistically significant (P < 0.05)

CVD, cardiovascular disease; LVMI, left ventricular mass index; LVH, left ventricular hypertrophy; UACR, urinary albumin-creatinine ratio; CRP, C-reactive protein; PTH, parathyroid hormone; FGF, fibroblast growth factor; ACEi, angiotensin-converting enzyme inhibitor; ARB, angiotensin receptor blocker.



**Supplementary Table S4.** Description of outcome events

| Left ventricular measurements | Events | Subjects | Incidence rate (/1000 person-years) |       |      |                 |                |
|-------------------------------|--------|----------|-------------------------------------|-------|------|-----------------|----------------|
|                               |        |          | CVD                                 | ASCVD | CHF  | All-cause death | Kidney failure |
| <b>All</b>                    | 832    | 4222     | 35.3                                | 15.5  | 18.3 | 18.2            | 49.8           |
| <b>CRIC</b>                   | 599    | 3125     | 38.5                                | 17.6  | 19.5 | 20.3            | 45.2           |
| <b>CKD-JAC</b>                | 233    | 1097     | 23.5                                | 7.9   | 13.8 | 10.2            | 67.6           |
| <b>LVH</b>                    |        |          |                                     |       |      |                 |                |
| <b>All</b>                    |        |          |                                     |       |      |                 |                |
| without LVH                   | 264    | 1976     | 15.9                                | 8.7   | 6.2  | 9.5             | 32.5           |
| with LVH                      | 568    | 2246     | 54.6                                | 22.2  | 30.1 | 26.5            | 66.3           |
| <b>CRIC</b>                   |        |          |                                     |       |      |                 |                |
| without LVH                   | 148    | 1275     | 16.3                                | 9.9   | 5.5  | 10.7            | 25.5           |
| with LVH                      | 451    | 1850     | 56.8                                | 23.7  | 30.7 | 27.8            | 60.6           |
| <b>CKD-JAC</b>                |        |          |                                     |       |      |                 |                |
| without LVH                   | 116    | 701      | 14.9                                | 5.7   | 7.8  | 6.5             | 50             |
| with LVH                      | 117    | 396      | 41.4                                | 12.6  | 26.3 | 17.8            | 103.9          |
| <b>P for interaction</b>      |        |          |                                     |       |      |                 |                |
| <b>Geometry</b>               |        |          |                                     |       |      |                 |                |
| <b>All</b>                    |        |          |                                     |       |      |                 |                |
| Normal                        | 106    | 790      | 15.6                                | 7.4   | 6.7  | 7.8             | 34.6           |
| Concentric remodeling         | 158    | 1186     | 16.1                                | 9.4   | 5.9  | 10.5            | 31.2           |
| Eccentric LVH                 | 89     | 379      | 63.7                                | 19.7  | 39.9 | 29.1            | 64.8           |
| Concentric LVH                | 479    | 1867     | 52.9                                | 22.6  | 28.3 | 26              | 66.6           |
| <b>CRIC</b>                   |        |          |                                     |       |      |                 |                |
| Normal                        | 35     | 340      | 17                                  | 9.5   | 6.7  | 9               | 22.5           |
| Concentric remodeling         | 113    | 935      | 16                                  | 10    | 5.1  | 11.3            | 26.6           |
| Eccentric LVH                 | 54     | 236      | 72.3                                | 24.2  | 42.1 | 30.1            | 56.1           |
| Concentric LVH                | 397    | 1614     | 54.5                                | 23.6  | 29.1 | 27.5            | 61.3           |
| <b>CKD-JAC</b>                |        |          |                                     |       |      |                 |                |
| Normal                        | 71     | 450      | 14.2                                | 5.4   | 6.7  | 6.6             | 47             |
| Concentric remodeling         | 45     | 251      | 16.3                                | 6.2   | 9.9  | 6.2             | 55.6           |
| Eccentric LVH                 | 35     | 143      | 45.5                                | 9.8   | 35.1 | 26.7            | 84.9           |
| Concentric LVH                | 82     | 253      | 39.1                                | 14.2  | 21.3 | 12.6            | 114.8          |

CVD, cardiovascular disease; ASCVD, atherosclerotic cardiovascular disease; CHF, congestive heart failure; CRIC, Chronic Renal Insufficiency Cohort; CKD-JAC, Chronic Kidney Disease Japan Cohort; LVH, left ventricular hypertrophy.

**Supplementary Table S5.** Factors associated with the incidence of cardiovascular disease (CVD) events

|                                        | <b>Model 1</b>     | <b>Model 2</b>          | <b>Model 3</b>          |
|----------------------------------------|--------------------|-------------------------|-------------------------|
|                                        | <b>HR (95% CI)</b> | <b>HR (96% CI)</b>      | <b>HR (97% CI)</b>      |
| LVMI (per 10 g/m <sup>2.7</sup> )      | 1.19 (1.14–1.24)   | 1.21 (1.15–1.26)        | 1.19 (1.14–1.24)        |
| LVEF (per 10%)                         | 0.72 (0.66–0.78)   | 0.72 (0.67–0.79)        | 0.72 (0.66–0.78)        |
| CRIC (vs. CKD-JAC)                     | 1.61 (1.22–2.12)   | 1.79 (1.34–2.38)        | 1.88 (1.38–2.56)        |
| Age (/10 years)                        | 1.40 (1.26–1.55)   | 1.35 (1.21–1.50)        | 1.40 (1.26–1.56)        |
| Male (vs. female)                      | 1.18 (0.99–1.42)   | 1.19 (0.98–1.45)        | 1.18 (0.97–1.44)        |
| Smoking status                         | 1.43 (1.14–1.80)   | 1.39 (1.10–1.76)        | 1.39 (1.10–1.77)        |
| eGFR (/10 ml/min/1.73 m <sup>2</sup> ) | 0.78 (0.72–0.84)   | 0.79 (0.73–0.86)        | 0.82 (0.75–0.90)        |
| ln(UACR)                               | 1.12 (1.07–1.17)   | 1.10 (1.05–1.16)        | 1.10 (1.04–1.15)        |
| Diabetes mellitus                      | 1.56 (1.29–1.88)   | 1.58 (1.29–1.93)        | 1.51 (1.23–1.85)        |
| Any CVD history                        | 2.18 (1.80–2.63)   | 2.13 (1.76–2.58)        | 2.10 (1.74–2.55)        |
| ln(CRP)                                | 1.04 (0.97–1.11)   | 1.06 (0.99–1.14)        | 1.07 (1.00–1.15)        |
| Systolic blood pressure, mmHg          |                    | 1.00 (1.00–1.01)        | 1.00 (1.00–1.01)        |
| Obesity category                       |                    |                         |                         |
| Underweight                            |                    | 1.62 (0.83–3.14)        | 1.50 (0.77–2.94)        |
| Normal                                 |                    | 1.00 (Reference)        | 1.00 (Reference)        |
| Overweight                             |                    | 0.78 (0.59–1.03)        | 0.79 (0.60–1.05)        |
| Obese I                                |                    | 0.85 (0.64–1.13)        | 0.83 (0.63–1.11)        |
| Obese II or more                       |                    | <b>0.59 (0.43–0.81)</b> | <b>0.58 (0.43–0.80)</b> |
| Number of antihypertensive agents      |                    | 1.05 (0.97–1.13)        | 1.05 (0.97–1.13)        |
| Hemoglobin, g/dL                       |                    | 0.96 (0.91–1.01)        | 0.98 (0.93–1.04)        |
| Corrected calcium, mg/dL               |                    |                         | 0.86 (0.71–1.03)        |
| Phosphate, mg/dL                       |                    |                         | <b>1.12 (1.04–1.21)</b> |
| ln(total PTH)                          |                    |                         | 1.00 (0.85–1.16)        |
| ln(intact FGF23)                       |                    |                         | 1.18 (1.00–1.38)        |
| Active vitamin D supplementation       |                    |                         | 0.77 (0.54–1.09)        |
| ln(25(OH) vitamin D)                   |                    |                         | <b>0.83 (0.70–0.97)</b> |

Multivariable models were adjusted as follows: **Model 1**: age, sex, baseline smoking status, eGFR, ln(UACR), diabetes, history of any CVD and CRP; **Model 2**: model 1 + systolic blood pressure, obesity category, number of classes of antihypertensive agents, and hemoglobin; **Model 3**: model 2 + corrected calcium, phosphate, ln(total PTH), ln(intact FGF23), active vitamin D supplementation, and ln(25(OH) vitamin D). CVD, cardiovascular disease; LVEF, left ventricular ejection fraction; CRIC, chronic renal insufficiency cohort; CKD-JAC, chronic kidney disease Japan cohort; UACR, urinary albumin-creatinine ratio.

Emboldened values were statistically significant ( $P < 0.05$ )

**Supplementary Table S6.** Association of left ventricular indices with the incidence of atherosclerotic cardiovascular disease (ASCVD) events

| Left ventricular indices                           | Events | Subjects | Incidence rate* | Model 1<br>HR (95% CI)  | Model 2<br>HR (95% CI)  | Model 3<br>HR (95% CI)  |
|----------------------------------------------------|--------|----------|-----------------|-------------------------|-------------------------|-------------------------|
| <b>LVEF (per 10%)</b>                              |        |          |                 |                         |                         |                         |
| All (CRIC+CKD-JAC)                                 | 248    | 4222     | 15.5            | 0.88 (0.77–1.00)        | 0.88 (0.77–1.01)        | 0.88 (0.77–1.01)        |
| CRIC                                               | 221    | 3125     | 17.6            | <b>0.85 (0.74–0.98)</b> | <b>0.86 (0.74–1.00)</b> | <b>0.86 (0.74–0.99)</b> |
| CKD-JAC                                            | 27     | 1097     | 7.9             | 1.04 (0.72–1.52)        | 1.07 (0.72–1.59)        | 1.07 (0.71–1.59)        |
| P for interaction                                  |        |          |                 | 0.43                    | 0.39                    | 0.39                    |
| <b>LVMI (continuous, per 10 g/m<sup>2.7</sup>)</b> |        |          |                 |                         |                         |                         |
| All (CRIC+CKD-JAC)                                 | 248    | 4222     | 15.5            | 1.04 (0.97–1.12)        | 1.06 (0.99–1.15)        | 1.07 (0.99–1.15)        |
| CRIC                                               | 221    | 3125     | 17.6            | 1.04 (0.97–1.12)        | 1.06 (0.98–1.15)        | 1.07 (0.99–1.16)        |
| CKD-JAC                                            | 27     | 1097     | 7.9             | 1.14 (0.88–1.46)        | 1.14 (0.85–1.51)        | 1.12 (0.84–1.50)        |
| P for interaction                                  |        |          |                 | 0.82                    | 0.77                    | 0.79                    |
| <b>LVH</b>                                         |        |          |                 |                         |                         |                         |
| All (CRIC+CKD-JAC)                                 |        |          |                 |                         |                         |                         |
| without LVH                                        | 68     | 1976     | 8.7             | 1.00 (Reference)        | 1.00 (Reference)        | 1.00 (Reference)        |
| with LVH                                           | 180    | 2246     | 22.2            | 1.27 (0.93–1.73)        | 1.37 (0.99–1.91)        | 1.39 (1.00–1.93)        |
| CRIC                                               |        |          |                 |                         |                         |                         |
| without LVH                                        | 55     | 1275     | 9.9             | 1.00 (Reference)        | 1.00 (Reference)        | 1.00 (Reference)        |
| with LVH                                           | 166    | 1850     | 23.7            | 1.21 (0.86–1.69)        | 1.34 (0.93–1.91)        | 1.35 (0.94–1.94)        |
| CKD-JAC                                            |        |          |                 |                         |                         |                         |
| without LVH                                        | 13     | 701      | 5.7             | 1.00 (Reference)        | 1.00 (Reference)        | 1.00 (Reference)        |
| with LVH                                           | 14     | 396      | 12.6            | 1.77 (0.81–3.88)        | 1.68 (0.71–3.97)        | 1.65 (0.70–3.92)        |
| P for interaction                                  |        |          |                 | 0.59                    | 0.61                    | 0.63                    |
| <b>Geometry</b>                                    |        |          |                 |                         |                         |                         |
| All (CRIC+CKD-JAC)                                 |        |          |                 |                         |                         |                         |
| Normal                                             | 22     | 790      | 7.4             | 1.00 (Reference)        | 1.00 (Reference)        | 1.00 (Reference)        |
| Concentric remodeling                              | 46     | 1186     | 9.4             | 1.09 (0.64–1.86)        | 1.10 (0.64–1.87)        | 1.15 (0.67–1.95)        |
| Eccentric LVH                                      | 26     | 379      | 19.7            | 1.11 (0.62–1.99)        | 1.24 (0.68–2.25)        | 1.29 (0.71–2.34)        |
| Concentric LVH                                     | 154    | 1867     | 22.6            | 1.40 (0.86–2.28)        | 1.51 (0.92–2.50)        | 1.57 (0.95–2.61)        |
| CRIC                                               |        |          |                 |                         |                         |                         |
| Normal                                             | 14     | 340      | 9.5             | 1.00 (Reference)        | 1.00 (Reference)        | 1.00 (Reference)        |
| Concentric remodeling                              | 41     | 935      | 10              | 1.10 (0.59–2.04)        | 1.11 (0.59–2.06)        | 1.17 (0.63–2.19)        |
| Eccentric LVH                                      | 22     | 236      | 24.2            | 1.08 (0.55–2.12)        | 1.24 (0.62–2.47)        | 1.30 (0.65–2.61)        |
| Concentric LVH                                     | 144    | 1614     | 23.6            | 1.33 (0.75–2.36)        | 1.47 (0.82–2.65)        | 1.56 (0.86–2.81)        |
| CKD-JAC                                            |        |          |                 |                         |                         |                         |
| Normal                                             | 8      | 450      | 5.4             | 1.00 (Reference)        | 1.00 (Reference)        | 1.00 (Reference)        |
| Concentric remodeling                              | 5      | 251      | 6.2             | 0.88 (0.28–2.75)        | 0.88 (0.27–2.80)        | 0.90 (0.28–2.88)        |
| Eccentric LVH                                      | 4      | 143      | 9.8             | 1.22 (0.35–4.28)        | 1.14 (0.31–4.15)        | 1.16 (0.31–4.26)        |
| Concentric LVH                                     | 10     | 253      | 14.2            | 1.95 (0.74–5.12)        | 1.89 (0.66–5.35)        | 1.86 (0.65–5.33)        |
| P for interaction                                  |        |          |                 | 0.82                    | 0.80                    | 0.83                    |

Multivariable models adjusted for **Model 1**: age, sex, baseline smoking status, eGFR, ln(UACR), diabetes mellitus, history of any CVD, CRP, CRIC (vs. CKD-JAC), and EF (or LVMI); **Model 2**: model 1 + systolic blood pressure, obesity category, number of classes of antihypertensive agents, and hemoglobin; **Model 3**: model 2 + corrected calcium, phosphate, ln(total PTH), ln(intact FGF23), active vitamin D supplementation, and ln(25(OH) vitamin D). CVD, cardiovascular disease; LVMI, left ventricular mass index; LVH, left ventricular hypertrophy; UACR, urinary albumin-creatinine ratio; PTH, parathyroid hormone; FGF, fibroblast growth factor.

\*Number of events per 1000 person-years

Emboldened values were statistically significant (P < 0.05).

**Supplementary Table S7.** Association of left ventricular indices with the incidence of congestive heart failure (CHF)

| Left ventricular indices                           | Events | Subjects | Incidence rate* | Model 1<br>HR (95% CI)  | Model 2<br>HR (95% CI)  | Model 3<br>HR (95% CI)  |
|----------------------------------------------------|--------|----------|-----------------|-------------------------|-------------------------|-------------------------|
| <b>LVEF (per 10%)</b>                              |        |          |                 |                         |                         |                         |
| All (CRIC+CKD-JAC)                                 | 292    | 4222     | 18.3            | <b>0.62 (0.56–0.69)</b> | <b>0.61 (0.55–0.68)</b> | <b>0.61 (0.55–0.68)</b> |
| CRIC                                               | 245    | 3125     | 19.5            | <b>0.61 (0.55–0.69)</b> | <b>0.60 (0.53–0.67)</b> | <b>0.60 (0.53–0.68)</b> |
| CKD-JAC                                            | 47     | 1097     | 13.8            | <b>0.66 (0.51–0.84)</b> | <b>0.66 (0.51–0.85)</b> | <b>0.64 (0.49–0.84)</b> |
| P for interaction                                  |        |          |                 | 0.55                    | 0.6                     | 0.75                    |
| <b>LVMI (continuous, per 10 g/m<sup>2.7</sup>)</b> |        |          |                 |                         |                         |                         |
| All (CRIC+CKD-JAC)                                 | 292    | 4222     | 18.3            | <b>1.28 (1.21–1.34)</b> | <b>1.28 (1.21–1.36)</b> | <b>1.26 (1.19–1.33)</b> |
| CRIC                                               | 245    | 3125     | 19.5            | <b>1.30 (1.23–1.37)</b> | <b>1.29 (1.22–1.37)</b> | <b>1.27 (1.20–1.35)</b> |
| CKD-JAC                                            | 47     | 1097     | 13.8            | 1.13 (0.95–1.35)        | 1.20 (0.99–1.46)        | 1.17 (0.95–1.44)        |
| P for interaction                                  |        |          |                 | 0.18                    | 0.28                    | 0.2                     |
| <b>LVH</b>                                         |        |          |                 |                         |                         |                         |
| All (CRIC+CKD-JAC)                                 |        |          |                 |                         |                         |                         |
| without LVH                                        | 49     | 1976     | 6.2             | 1.00 (Reference)        | 1.00 (Reference)        | 1.00 (Reference)        |
| with LVH                                           | 243    | 2246     | 30.1            | <b>2.04 (1.46–2.85)</b> | <b>1.97 (1.39–2.80)</b> | <b>1.85 (1.30–2.63)</b> |
| CRIC                                               |        |          |                 |                         |                         |                         |
| without LVH                                        | 31     | 1275     | 5.5             | 1.00 (Reference)        | 1.00 (Reference)        | 1.00 (Reference)        |
| with LVH                                           | 214    | 1850     | 30.7            | <b>2.21 (1.49–3.29)</b> | <b>2.05 (1.35–3.10)</b> | <b>1.94 (1.28–2.94)</b> |
| CKD-JAC                                            |        |          |                 |                         |                         |                         |
| without LVH                                        | 18     | 701      | 7.8             | 1.00 (Reference)        | 1.00 (Reference)        | 1.00 (Reference)        |
| with LVH                                           | 29     | 396      | 26.3            | 1.71 (0.90–3.24)        | <b>2.01 (1.01–4.00)</b> | 1.94 (0.95–3.96)        |
| P for interaction                                  |        |          |                 | 0.68                    | 0.69                    | 0.64                    |
| <b>Geometry</b>                                    |        |          |                 |                         |                         |                         |
| All (CRIC+CKD-JAC)                                 |        |          |                 |                         |                         |                         |
| Normal                                             | 20     | 790      | 6.7             | 1.00 (Reference)        | 1.00 (Reference)        | 1.00 (Reference)        |
| Concentric remodeling                              | 29     | 1186     | 5.9             | 0.75 (0.42–1.33)        | 0.75 (0.42–1.34)        | 0.71 (0.40–1.27)        |
| Eccentric LVH                                      | 51     | 379      | 39.9            | <b>1.78 (1.08–2.93)</b> | <b>1.76 (1.06–2.94)</b> | 1.58 (0.94–2.66)        |
| Concentric LVH                                     | 192    | 1867     | 28.3            | <b>1.72 (1.09–2.73)</b> | <b>1.66 (1.03–2.67)</b> | 1.51 (0.94–2.43)        |
| CRIC                                               |        |          |                 |                         |                         |                         |
| Normal                                             | 10     | 340      | 6.7             | 1.00 (Reference)        | 1.00 (Reference)        | 1.00 (Reference)        |
| Concentric remodeling                              | 21     | 935      | 5.1             | 0.76 (0.37–1.58)        | 0.78 (0.38–1.62)        | 0.74 (0.35–1.54)        |
| Eccentric LVH                                      | 37     | 236      | 42.1            | <b>1.94 (1.01–3.73)</b> | 1.88 (0.97–3.67)        | 1.66 (0.85–3.26)        |
| Concentric LVH                                     | 177    | 1614     | 29.1            | <b>1.84 (1.01–3.36)</b> | 1.72 (0.93–3.19)        | 1.58 (0.85–2.92)        |
| CKD-JAC                                            |        |          |                 |                         |                         |                         |
| Normal                                             | 10     | 450      | 6.7             | 1.00 (Reference)        | 1.00 (Reference)        | 1.00 (Reference)        |
| Concentric remodeling                              | 8      | 251      | 9.9             | 0.65 (0.22–1.88)        | 0.72 (0.24–2.13)        | 0.74 (0.25–2.20)        |
| Eccentric LVH                                      | 14     | 143      | 35.1            | 1.47 (0.63–3.43)        | 1.69 (0.69–4.16)        | 1.63 (0.65–4.11)        |
| Concentric LVH                                     | 15     | 253      | 21.3            | 1.49 (0.68–3.27)        | 1.88 (0.79–4.46)        | 1.86 (0.76–4.54)        |
| P for interaction                                  |        |          |                 | 0.94                    | 0.94                    | >0.99                   |

Multivariable models adjusted for **Model 1**: age, sex, baseline smoking status, eGFR, ln(UACR), diabetes mellitus, history of any CVD, CRP, CRIC (vs. CKD-JAC), and EF (or LVMI); **Model 2**: model 1 + systolic blood pressure, obesity category, number of classes of antihypertensive agents, and hemoglobin; **Model 3**: model 2 + corrected calcium, phosphate, ln(total PTH), ln(intact FGF23), active vitamin D supplementation, and ln(25(OH) vitamin D). CVD, cardiovascular disease; LVMI, left ventricular mass index; LVH, left ventricular hypertrophy; UACR, urinary albumin-creatinine ratio; PTH, parathyroid hormone; FGF, fibroblast growth factor.

\*Number of events per 1000 person-years

Emboldened values were statistically significant (P < 0.05).

**Supplementary Table S8.** Association of left ventricular indices with the incidence of all-cause death

| Left ventricular indices                           | Events | Subjects | Incidence rate* | Model 1<br>HR (95% CI)  | Model 2<br>HR (95% CI)  | Model 3<br>HR (95% CI)  |
|----------------------------------------------------|--------|----------|-----------------|-------------------------|-------------------------|-------------------------|
| <b>LVEF (per 10%)</b>                              |        |          |                 |                         |                         |                         |
| All (CRIC+CKD-JAC)                                 | 304    | 4222     | 18.2            | <b>0.81 (0.73–0.91)</b> | <b>0.86 (0.77–0.97)</b> | <b>0.86 (0.77–0.97)</b> |
| CRIC                                               | 269    | 3125     | 20.3            | <b>0.80 (0.71–0.91)</b> | <b>0.86 (0.76–0.98)</b> | <b>0.87 (0.76–0.99)</b> |
| CKD-JAC                                            | 35     | 1097     | 10.2            | 0.86 (0.65–1.16)        | 0.88 (0.65–1.18)        | 0.86 (0.63–1.16)        |
| P for interaction                                  |        |          |                 | 0.94                    | 0.95                    | 0.93                    |
| <b>LVMI (continuous, per 10 g/m<sup>2.7</sup>)</b> |        |          |                 |                         |                         |                         |
| All (CRIC+CKD-JAC)                                 | 304    | 4222     | 18.2            | <b>1.15 (1.08–1.22)</b> | <b>1.22 (1.14–1.29)</b> | <b>1.20 (1.13–1.28)</b> |
| CRIC                                               | 269    | 3125     | 20.3            | <b>1.14 (1.08–1.21)</b> | <b>1.22 (1.14–1.30)</b> | <b>1.21 (1.13–1.29)</b> |
| CKD-JAC                                            | 35     | 1097     | 10.2            | 1.19 (0.97–1.46)        | 1.22 (0.97–1.52)        | 1.18 (0.93–1.50)        |
| P for interaction                                  |        |          |                 | 0.94                    | 0.84                    | 0.82                    |
| <b>LVH</b>                                         |        |          |                 |                         |                         |                         |
| All (CRIC+CKD-JAC)                                 |        |          |                 |                         |                         |                         |
| without LVH                                        | 77     | 1976     | 9.5             | 1.00 (Reference)        | 1.00 (Reference)        | 1.00 (Reference)        |
| with LVH                                           | 227    | 2246     | 26.5            | <b>1.42 (1.07–1.89)</b> | <b>1.74 (1.29–2.34)</b> | <b>1.64 (1.21–2.21)</b> |
| CRIC                                               |        |          |                 |                         |                         |                         |
| without LVH                                        | 62     | 1275     | 10.7            | 1.00 (Reference)        | 1.00 (Reference)        | 1.00 (Reference)        |
| with LVH                                           | 207    | 1850     | 27.8            | <b>1.31 (0.97–1.78)</b> | <b>1.63 (1.18–2.26)</b> | <b>1.53 (1.10–2.12)</b> |
| CKD-JAC                                            |        |          |                 |                         |                         |                         |
| without LVH                                        | 15     | 701      | 6.5             | 1.00 (Reference)        | 1.00 (Reference)        | 1.00 (Reference)        |
| with LVH                                           | 20     | 396      | 17.8            | <b>2.11 (1.04–4.29)</b> | <b>2.29 (1.06–4.94)</b> | 2.07 (0.94–4.56)        |
| P for interaction                                  |        |          |                 | 0.4                     | 0.41                    | 0.38                    |
| <b>Geometry</b>                                    |        |          |                 |                         |                         |                         |
| All (CRIC+CKD-JAC)                                 |        |          |                 |                         |                         |                         |
| Normal                                             | 24     | 790      | 7.8             | 1.00 (Reference)        | 1.00 (Reference)        | 1.00 (Reference)        |
| Concentric remodeling                              | 53     | 1186     | 10.5            | 1.25 (0.77–2.05)        | 1.31 (0.80–2.15)        | 1.23 (0.75–2.01)        |
| Eccentric LVH                                      | 40     | 379      | 29.1            | 1.56 (0.94–2.61)        | <b>1.94 (1.15–3.28)</b> | <b>1.76 (1.04–2.99)</b> |
| Concentric LVH                                     | 187    | 1867     | 26              | <b>1.68 (1.07–2.64)</b> | <b>2.12 (1.33–3.38)</b> | <b>1.91 (1.20–3.04)</b> |
| CRIC                                               |        |          |                 |                         |                         |                         |
| Normal                                             | 14     | 340      | 9               | 1.00 (Reference)        | 1.00 (Reference)        | 1.00 (Reference)        |
| Concentric remodeling                              | 48     | 935      | 11.3            | 1.19 (0.67–2.11)        | 1.24 (0.70–2.20)        | 1.12 (0.63–2.00)        |
| Eccentric LVH                                      | 29     | 236      | 30.1            | 1.29 (0.70–2.37)        | 1.63 (0.88–3.04)        | 1.42 (0.76–2.66)        |
| Concentric LVH                                     | 178    | 1614     | 27.5            | 1.52 (0.90–2.59)        | <b>1.96 (1.14–3.38)</b> | 1.71 (0.99–2.95)        |
| CKD-JAC                                            |        |          |                 |                         |                         |                         |
| Normal                                             | 10     | 450      | 6.6             | 1.00 (Reference)        | 1.00 (Reference)        | 1.00 (Reference)        |
| Concentric remodeling                              | 5      | 251      | 6.2             | 1.12 (0.39–3.21)        | 1.24 (0.42–3.62)        | 1.22 (0.41–3.61)        |
| Eccentric LVH                                      | 11     | 143      | 26.7            | <b>2.68 (1.02–7.01)</b> | <b>2.86 (1.01–8.06)</b> | 2.60 (0.90–7.51)        |
| Concentric LVH                                     | 9      | 253      | 12.6            | 1.88 (0.72–4.88)        | 2.24 (0.83–6.03)        | 2.02 (0.74–5.54)        |
| P for interaction                                  |        |          |                 | 0.73                    | 0.76                    | 0.64                    |

Multivariable models adjusted for **Model 1**: age, sex, baseline smoking status, eGFR, ln(UACR), diabetes mellitus, history of any CVD, CRP, CRIC (vs. CKD-JAC), and EF (or LVMI); **Model 2**: model 1 + systolic blood pressure, obesity category, number of classes of antihypertensive agents, and hemoglobin; **Model 3**: model 2 + corrected calcium, phosphate, ln(total PTH), ln(intact FGF23), active vitamin D supplementation, and ln(25(OH) vitamin D). CVD, cardiovascular disease; LVMI, left ventricular mass index; LVH, left ventricular hypertrophy; UACR, urinary albumin-creatinine ratio; PTH, parathyroid hormone; FGF, fibroblast growth factor.

\*Number of events per 1000 person-years

Emboldened values were statistically significant (P < 0.05).

**Supplementary Table S9.** Association of left ventricular indices with the incidence of kidney failure

| Left ventricular measurements                     | Events | Subjects | Incidence rate* | Model 1                 | Model 2                 | Model 3                 |
|---------------------------------------------------|--------|----------|-----------------|-------------------------|-------------------------|-------------------------|
| <b>LVEF (per 10%)</b>                             |        |          |                 |                         |                         |                         |
| All (CRIC+CKD-JAC)                                | 832    | 4222     | 49.8            | 0.92 (0.85–1.00)        | 0.95 (0.87–1.03)        | 0.94 (0.87–1.02)        |
| CRIC                                              | 599    | 3125     | 45.2            | <b>0.88 (0.80–0.97)</b> | <b>0.89 (0.81–0.99)</b> | <b>0.89 (0.80–0.98)</b> |
| CKD-JAC                                           | 233    | 1097     | 67.6            | 1.03 (0.90–1.19)        | 1.04 (0.90–1.20)        | 1.02 (0.88–1.19)        |
| P for interaction                                 |        |          |                 | 0.23                    | 0.25                    | 0.29                    |
| <b>LVMI (continuous, per 10g/m<sup>2.7</sup>)</b> |        |          |                 |                         |                         |                         |
| All (CRIC+CKD-JAC)                                | 832    | 4222     | 49.8            | <b>1.08 (1.04–1.12)</b> | <b>1.07 (1.03–1.12)</b> | <b>1.06 (1.01–1.10)</b> |
| CRIC                                              | 599    | 3125     | 45.2            | <b>1.07 (1.02–1.11)</b> | <b>1.07 (1.02–1.12)</b> | <b>1.06 (1.01–1.11)</b> |
| CKD-JAC                                           | 233    | 1097     | 67.6            | <b>1.12 (1.03–1.21)</b> | <b>1.09 (1.00–1.19)</b> | <b>1.09 (1.00–1.19)</b> |
| P for interaction                                 |        |          |                 | 0.06                    | 0.03                    | 0.01                    |
| <b>LVH</b>                                        |        |          |                 |                         |                         |                         |
| All (CRIC+CKD-JAC)                                |        |          |                 |                         |                         |                         |
| without LVH                                       | 264    | 1976     | 32.5            | Reference               | Reference               | Reference               |
| with LVH                                          | 568    | 2246     | 66.3            | <b>1.23 (1.05–1.46)</b> | <b>1.24 (1.04–1.48)</b> | 1.18 (0.99–1.41)        |
| CRIC                                              |        |          |                 |                         |                         |                         |
| without LVH                                       | 148    | 1275     | 25.5            | Reference               | Reference               | Reference               |
| with LVH                                          | 451    | 1850     | 60.6            | 1.16 (0.94–1.43)        | 1.22 (0.98–1.52)        | 1.17 (0.93–1.46)        |
| CKD-JAC                                           |        |          |                 |                         |                         |                         |
| without LVH                                       | 116    | 701      | 50              | Reference               | Reference               | Reference               |
| with LVH                                          | 117    | 396      | 103.9           | <b>1.40 (1.07–1.84)</b> | 1.24 (0.92–1.67)        | 1.24 (0.91–1.67)        |
| P for interaction                                 |        |          |                 | 0.07                    | 0.07                    | 0.04                    |
| <b>Geometry</b>                                   |        |          |                 |                         |                         |                         |
| All (CRIC+CKD-JAC)                                |        |          |                 |                         |                         |                         |
| Normal                                            | 106    | 790      | 34.6            | 1.00 (Reference)        | 1.00 (Reference)        | 1.00 (Reference)        |
| Concentric remodeling                             | 158    | 1186     | 31.2            | 1.13 (0.87–1.45)        | 1.15 (0.89–1.49)        | 1.12 (0.87–1.45)        |
| Eccentric LVH                                     | 89     | 379      | 64.8            | <b>1.31 (1.00–1.72)</b> | <b>1.39 (1.05–1.83)</b> | <b>1.33 (1.00–1.76)</b> |
| Concentric LVH                                    | 479    | 1867     | 66.6            | <b>1.32 (1.05–1.67)</b> | <b>1.32 (1.04–1.68)</b> | 1.24 (0.97–1.58)        |
| CRIC                                              |        |          |                 |                         |                         |                         |
| Normal                                            | 35     | 340      | 22.5            | 1.00 (Reference)        | 1.00 (Reference)        | 1.00 (Reference)        |
| Concentric remodeling                             | 113    | 935      | 26.6            | 1.05 (0.73–1.50)        | 1.05 (0.72–1.51)        | 1.02 (0.70–1.47)        |
| Eccentric LVH                                     | 54     | 236      | 56.1            | 1.15 (0.78–1.69)        | 1.30 (0.88–1.93)        | 1.25 (0.84–1.85)        |
| Concentric LVH                                    | 397    | 1614     | 61.3            | 1.20 (0.86–1.68)        | 1.23 (0.87–1.72)        | 1.14 (0.81–1.60)        |
| CKD-JAC                                           |        |          |                 |                         |                         |                         |
| Normal                                            | 71     | 450      | 47              | 1.00 (Reference)        | 1.00 (Reference)        | 1.00 (Reference)        |
| Concentric remodeling                             | 45     | 251      | 55.6            | 0.95 (0.64–1.41)        | 0.95 (0.63–1.42)        | 0.95 (0.63–1.44)        |
| Eccentric LVH                                     | 35     | 143      | 84.9            | 1.40 (0.94–2.10)        | 1.20 (0.79–1.84)        | 1.28 (0.83–1.98)        |
| Concentric LVH                                    | 82     | 253      | 114.8           | <b>1.39 (1.00–1.95)</b> | 1.28 (0.89–1.85)        | 1.21 (0.84–1.76)        |
| P for interaction                                 |        |          |                 | 0.38                    | 0.44                    | 0.27                    |

Multivariable models adjusted for **Model 1**: age, sex, baseline smoking status, eGFR, ln(UACR), diabetes mellitus, history of any CVD, CRP, CRIC (vs. CKD-JAC), and EF (or LVMI); **Model 2**: model 1 + systolic blood pressure, obesity category, number of classes of antihypertensive agents, and hemoglobin; **Model 3**: model 2 + corrected calcium, phosphate, ln(total PTH), ln(intact FGF23), active vitamin D supplementation, and ln(25(OH) vitamin D). CVD, cardiovascular disease; LVMI, left ventricular mass index; LVH, left ventricular hypertrophy; UACR, urinary albumin-creatinine ratio; PTH, parathyroid hormone; FGF, fibroblast growth factor.

\*Number of events per 1000 person-years

Emboldened values were statistically significant (P < 0.05).

**Supplementary Table S10.** Association of left atrial dimension (LAD: /10 mm) with subsequent cardiovascular disease (CVD) events

|                                  | Model1                  | Model2                  | Model3                  |
|----------------------------------|-------------------------|-------------------------|-------------------------|
| CVD event                        |                         |                         |                         |
| LAD (per 10 mm)                  | <b>1.17 (1.01–1.35)</b> | <b>1.21 (1.05–1.40)</b> | <b>1.22 (1.06–1.42)</b> |
| LVMI (per 10g/m <sup>2.7</sup> ) | <b>1.18 (1.13–1.23)</b> | <b>1.19 (1.14–1.25)</b> | <b>1.18 (1.12–1.23)</b> |
| LVEF (per 10%)                   | <b>0.73 (0.67–0.79)</b> | <b>0.74 (0.68–0.80)</b> | <b>0.73 (0.67–0.80)</b> |
| ASCVD                            |                         |                         |                         |
| LAD (per 10 mm)                  | 0.95 (0.75–1.19)        | 0.97 (0.77–1.22)        | 0.97 (0.77–1.22)        |
| LVMI (per 10g/m <sup>2.7</sup> ) | 1.06 (0.98–1.14)        | 1.06 (0.98–1.15)        | 1.07 (0.99–1.16)        |
| LVEF (per 10%)                   | 0.89 (0.77–1.02)        | 0.89 (0.77–1.03)        | 0.89 (0.77–1.02)        |
| CHF                              |                         |                         |                         |
| LAD (per 10 mm)                  | <b>1.44 (1.19–1.74)</b> | <b>1.47 (1.21–1.78)</b> | <b>1.48 (1.22–1.80)</b> |
| LVMI (per 10g/m <sup>2.7</sup> ) | <b>1.24 (1.18–1.31)</b> | <b>1.25 (1.18–1.32)</b> | <b>1.23 (1.16–1.30)</b> |
| LVEF (per 10%)                   | <b>0.64 (0.58–0.71)</b> | <b>0.63 (0.57–0.71)</b> | <b>0.63 (0.57–0.71)</b> |
| All-cause death                  |                         |                         |                         |
| LAD (per 10 mm)                  | 1.10 (0.91–1.33)        | <b>1.22 (1.00–1.48)</b> | <b>1.26 (1.03–1.53)</b> |
| LVMI (per 10g/m <sup>2.7</sup> ) | <b>1.14 (1.08–1.22)</b> | <b>1.20 (1.13–1.28)</b> | <b>1.19 (1.11–1.27)</b> |
| LVEF (per 10%)                   | <b>0.83 (0.74–0.93)</b> | <b>0.89 (0.79–1.00)</b> | <b>0.89 (0.79–1.00)</b> |
| Kidney failure                   |                         |                         |                         |
| LAD (per 10 mm)                  | 1.02 (0.90–1.15)        | 1.00 (0.88–1.14)        | 1.00 (0.88–1.14)        |
| LVMI (per 10g/m <sup>2.7</sup> ) | <b>1.07 (1.02–1.11)</b> | <b>1.06 (1.02–1.11)</b> | <b>1.05 (1.00–1.10)</b> |
| LVEF (per 10%)                   | 0.93 (0.86–1.01)        | 0.95 (0.87–1.03)        | 0.94 (0.87–1.03)        |

Emboldened values were statistically significant ( $P < 0.05$ )

Model 1: CRIC (vs. CKD-JAC), age, sex, baseline smoking status, eGFR, ln(UACR), diabetes mellitus, history of any CVD, CRP

Model 2: model 1 + systolic blood pressure, obesity category, number of classes of antihypertensive agents, and hemoglobin

Model 3: model 2 + corrected calcium, phosphate, ln(total PTH), ln(intact FGF23), active vitamin D supplementation, and ln(25(OH) vitamin D).

CVD, cardiovascular disease;

**Supplementary Table S11.** Subgroup analyses of the association between region and outcomes (no cardiovascular disease [CVD] history and estimated glomerular filtration rate [eGFR] 20–60 mL/min/173 m<sup>2</sup>)

| Event and subgroup        | Model1           | Model2           | Model3           |
|---------------------------|------------------|------------------|------------------|
| <b>CVD event</b>          |                  |                  |                  |
| All (N=4222)              | 1.61 (1.22–2.12) | 1.79 (1.34–2.38) | 1.88 (1.38–2.56) |
| No CVD history (N = 2851) | 2.09 (1.28–3.41) | 2.34 (1.41–3.91) | 2.32 (1.32–4.09) |
| eGFR 20-60 (N = 3142)     | 1.66 (1.18–2.34) | 1.87 (1.31–2.67) | 1.85 (1.27–2.69) |
| <b>ASCVD</b>              |                  |                  |                  |
| All (N=4222)              | 2.75 (1.73–4.39) | 3.01 (1.87–4.86) | 3.23 (1.92–5.43) |
| No CVD history (N = 2851) | 2.87 (1.35–6.12) | 3.08 (1.42–6.67) | 3.53 (1.49–8.36) |
| eGFR 20-60 (N = 3142)     | 2.62 (1.53–4.49) | 2.85 (1.64–4.95) | 3.02 (1.67–5.48) |
| <b>CHF</b>                |                  |                  |                  |
| All (N=4222)              | 1.31 (0.91–1.88) | 1.44 (0.99–2.11) | 1.70 (1.13–2.58) |
| No CVD history (N = 2851) | 1.62 (0.80–3.26) | 1.80 (0.85–3.81) | 2.02 (0.87–4.65) |
| eGFR 20-60 (N = 3142)     | 1.53 (0.95–2.47) | 1.68 (1.01–2.78) | 1.77 (1.04–3.01) |
| <b>Death</b>              |                  |                  |                  |
| All (N=4222)              | 1.77 (1.18–2.67) | 2.27 (1.49–3.47) | 2.38 (1.51–3.75) |
| No CVD history (N = 2851) | 2.05 (1.08–3.90) | 2.65 (1.36–5.16) | 2.11 (1.02–4.36) |
| eGFR 20-60 (N = 3142)     | 1.60 (1.00–2.55) | 2.19 (1.34–3.58) | 2.35 (1.39–3.98) |
| <b>Kidney failure</b>     |                  |                  |                  |
| All (N=4222)              | 2.38 (1.96–2.90) | 2.53 (2.06–3.11) | 2.35 (1.86–2.96) |
| No CVD history (N = 2851) | 2.52 (1.92–3.31) | 2.90 (2.17–3.88) | 2.51 (1.82–3.46) |
| eGFR 20-60 (N = 3142)     | 3.07 (2.26–4.17) | 3.26 (2.37–4.49) | 3.08 (2.20–4.32) |

Multivariable models adjusted for **Model 1**: age, sex, baseline smoking status, eGFR, ln(UACR), diabetes mellitus, history of any CVD, CRP, CRIC (vs. CKD-JAC), and EF (or LVMI); **Model 2**: model 1 + systolic blood pressure, obesity category, number of classes of antihypertensive agents, and hemoglobin; **Model 3**: model 2 + corrected calcium, phosphate, ln(total PTH), ln(intact FGF23), active vitamin D supplementation, and ln(25(OH) vitamin D). CVD, cardiovascular disease; LVMI, left ventricular mass index; LVH, left ventricular hypertrophy; UACR, urinary albumin-creatinine ratio; PTH, parathyroid hormone; FGF, fibroblast growth factor.



**Supplementary Table S12.** Proportion mediated of parameters associated with outcomes using mediation analysis

| Outcome        | (%)  | LVMI               | EF                  | LVMI+EF             | P                   | iFGF23             | CRP                 | P+FGF+CRP          |
|----------------|------|--------------------|---------------------|---------------------|---------------------|--------------------|---------------------|--------------------|
|                |      | Proportion         | Proportion          | Proportion          | Proportion          | Proportion         | Proportion          | Proportion         |
| CVD            |      |                    |                     |                     |                     |                    |                     |                    |
|                | CDE  | 71.2 (62.1-78.4)   | 66.5 (53.8-75.6)    | 53.8 (38.3-61.2)    | 93.4 (86.9-99.5)    | 86.4 (68.5-132)    | 93.9 (86.9-99.0)    | 73.1 (55.9-121)    |
|                | RI   | 2.77 (-1.28-7.70)  | -10.6 (-16.5--3.70) | -6.21 (-13.2-0.00)  | -4.44 (-9.02--0.70) | 1.44 (-4.08-34.7)  | -3.30 (-7.36--0.30) | -6.15 (-14.2-24.3) |
|                | MI   | 16.0 (7.35-23.2)   | 31.7 (21.2-44.0)    | 33.3 (19.7-45.2)    | 11.4 (1.07-20.3)    | 3.01 (-60.9-15.3)  | 7.55 (-1.05-15.2)   | 22.7 (-42.6-38.7)  |
|                | PNIE | 10.1 (4.44-18.8)   | 12.5 (3.45-25.2)    | 19.1 (8.47-38.6)    | -0.36 (-8.20-9.00)  | 9.16 (-4.51-24.5)  | 1.85 (-3.10-7.10)   | 10.3 (-7.27-35.7)  |
|                | OPM  | 26.0 (20.9-32.5)   | 44.1 (32.3-57.8)    | 52.4 (44.1-66.0)    | 11.1 (5.45-16.6)    | 12.2 (-53.8-25.3)  | 9.40 (3.22-17.2)    | 33.1 (-32.3-44.6)  |
| ASCVD          |      |                    |                     |                     |                     |                    |                     |                    |
|                | CDE  | 91.1 (80.3-99.9)   | 90.2 (77.4-99.7)    | 86.3 (72.0-97.7)    | 108 (98.4-133)      | 93.7 (68.8-150)    | 99.4 (90.8-112)     | 102 (71.2-177)     |
|                | RI   | -0.39 (-5.61-1.70) | -10.4 (-21.2-1.40)  | -9.93 (-26.6-1.90)  | -1.10 (-21.3-13.4)  | 0.16 (-5.06-92.8)  | -5.38 (-16.7-3.30)  | -6.86 (-33.8-93.8) |
|                | MI   | 5.05 (-7.89-16.2)  | 21.4 (-0.73-42.4)   | 21.8 (-1.16-44.0)   | -0.062 (-23.1-19.5) | 5.85 (-133-25.3)   | 9.07 (-5.66-23.8)   | 13.9 (-148.0-46.4) |
|                | PNIE | 4.28 (-2.78-18.0)  | -1.17 (-12.0-8.70)  | 1.85 (-11.9-15.8)   | -7.04 (-22.5-6.80)  | 0.30 (-25.3-27.1)  | -3.14 (-14.7-5.40)  | -8.90 (-49.9-32.2) |
|                | OPM  | 9.33 (0.79-19.9)   | 20.2 (2.02-38.9)    | 23.7 (8.62-44.2)    | -7.10 (-23.5-3.8)   | 6.16 (-141.3-27.3) | 5.93 (-7.24-17.3)   | 5.10 (-160.0-29.7) |
| CHF            |      |                    |                     |                     |                     |                    |                     |                    |
|                | CDE  | 58.6 (46.1-67.4)   | 49.5 (37.3-61.9)    | 34.5 (18.6-43.5)    | 95.6 (89.7-104)     | 79.3 (66.8-127)    | 93.8 (84.3-101)     | 69.3 (51.6-117)    |
|                | RI   | 8.22 (1.65-15.3)   | -9.63 (-15.1--1.70) | -0.49 (-8.52-7.10)  | -4.25 (-10.0-0.70)  | 3.02 (-7.46-34.1)  | -3.51 (-8.33-2.60)  | -4.75 (-18.1-24.6) |
|                | MI   | 23.2 (10.5-32.9)   | 38.3 (19.8-50.5)    | 40.9 (25.6-57.4)    | 11.0 (-4.45-21.8)   | 5.13 (-61.4-19.0)  | 8.06 (-4.27-18.9)   | 24.2 (-50.4-41.5)  |
|                | PNIE | 10.0 (1.91-21.9)   | 21.9 (5.65-38.9)    | 25.1 (9.34-51.7)    | -2.36 (-10.7-11.4)  | 12.55 (-6.05-41.1) | 1.66 (-4.91-8.10)   | 11.2 (-9.11-41.9)  |
|                | OPM  | 33.2 (27.1-42.8)   | 60.2 (45.8-71.6)    | 66.0 (57.0-80.5)    | 8.61 (1.12-14.2)    | 17.7 (-48.0-29.9)  | 9.73 (-3.21-20.6)   | 35.4 (-40.6-47.7)  |
| Death          |      |                    |                     |                     |                     |                    |                     |                    |
|                | CDE  | 77.1 (67.8-86.1)   | 79.8 (67.0-89.2)    | 69.8 (56.1-80.9)    | 95.9 (85.1-123)     | 107.2 (67.6-180)   | 86.0 (76.0-92.0)    | 83.0 (52.4-142)    |
|                | RI   | -1.61 (-6.03-3.00) | -10.7 (-17.1--4.40) | -8.38 (-20.1-0.20)  | -11.3 (-43.5--2.00) | 6.14 (-9.80-37.6)  | -5.10 (-10.0--1.40) | -12.2 (-44.7-34.4) |
|                | MI   | 14.9 (4.50-23.0)   | 23.6 (9.47-40.6)    | 25.6 (6.41-42.9)    | 22.0 (3.79-58.2)    | -26.3 (-133-12.9)  | 13.7 (2.66-26.4)    | 19.6 (-64.6-56.1)  |
|                | PNIE | 9.58 (2.17-21.2)   | 7.34 (-4.15-19.8)   | 13.0 (0.45-32.4)    | -6.60 (-31.4-8.10)  | 12.9 (-4.57-57.9)  | 5.39 (-0.08-14.00)  | 9.54 (-19.7-53.7)  |
|                | OPM  | 24.5 (17.3-33.8)   | 31.0 (16.5-43.7)    | 38.6 (25.0-52.9)    | 15.5 (7.51-25.4)    | -13.4 (-106-28.2)  | 19.1 (11.8-30.2)    | 29.1 (-39.9-55.1)  |
| Kidney failure |      |                    |                     |                     |                     |                    |                     |                    |
|                | CDE  | 94.8 (85.2-105)    | 92.4 (83.2-102)     | 91.2 (79.6-105)     | 93.2 (83.6-103)     | 106.4 (85.9-132)   | 102 (97.9-106)      | 98.2 (73.2-123)    |
|                | RI   | -1.52 (-8.18-1.60) | -9.89 (-18.6-0.60)  | -12.8 (-20.7--0.30) | -3.50 (-7.90-0.00)  | -11.3 (-27.5-1.50) | 3.64 (-0.52-14.0)   | -10.3 (-25.4-6.50) |
|                | MI   | -1.59 (-16.4-6.50) | 18.2 (-1.62-31.8)   | 16.8 (-9.90-30.4)   | -13.8 (-32.1-1.10)  | -29.5 (-116-11.0)  | -6.30 (-20.4-1.10)  | -61.8 (-140--6.20) |
|                | PNIE | 8.35 (2.20-20.3)   | -0.72 (-6.86-3.90)  | 4.77 (-2.43-19.4)   | 24.2 (8.21-44.8)    | 34.4 (-6.62-117)   | 0.69 (-3.04-5.10)   | 73.8 (18.6-155)    |
|                | OPM  | 6.76 (0.16-14.4)   | 17.5 (0.63-30.4)    | 21.6 (4.54-34.8)    | 10.3 (-0.47-18.6)   | 4.87 (-15.3-20.7)  | -5.61 (-19.5-2.1)   | 12.0 (-12.9-32.0)  |

Proportion mediated for each parameter was calculated using causal mediation analysis based on counterfactual approach. We adjusted for the same covariates in Figure 6. Overall proportion mediated represents the mediation effects of interest, which can be calculated as  $(MI+PNIE)/(CDE+RI+MI+PNIE)$ . LVMI, left ventricular mass index; EF, ejection fraction; CKD-JAC, chronic kidney disease Japan cohort; CRIC, chronic renal insufficiency cohort; CVD, cardiovascular disease; CHF, congestive heart failure. CRE, controlled direct effect; RI, reference interaction; MI, mediated interaction; PNIE, pure natural indirect effect; OPM, overall proportion mediated.

## Supplementary Figure S1. Causal diagram

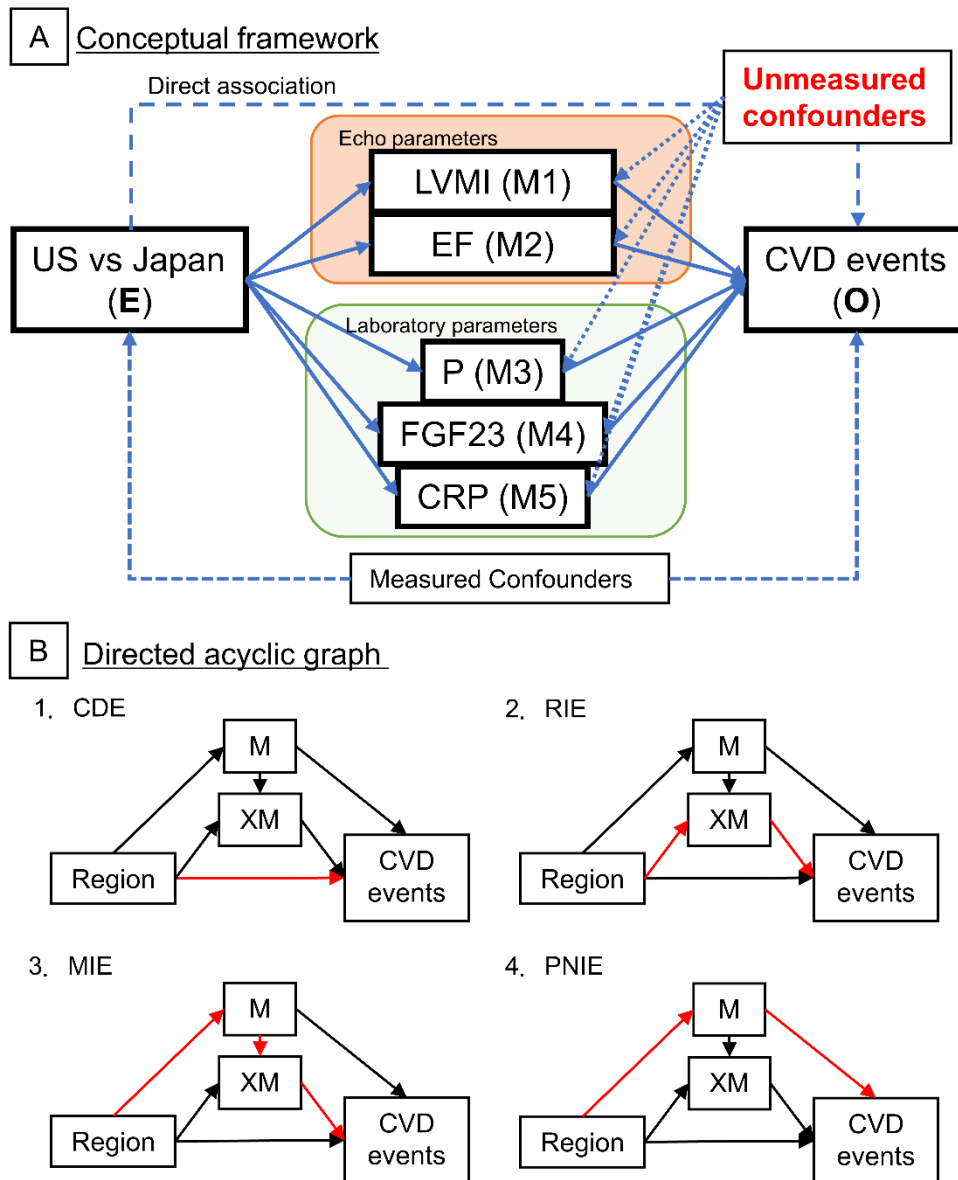

| Effects (%) | Mediators         |                     |
|-------------|-------------------|---------------------|
|             | LVMI              | EF                  |
| CDE         | 71.2 (62.1-78.4)  | 66.5 (53.8-75.6)    |
| RIE         | 2.77 (-1.28-7.70) | -10.6 (-16.5--3.70) |
| MIE         | 16.0 (7.35-23.2)  | 31.7 (21.2-44.0)    |
| PNIE        | 10.1 (4.44-18.8)  | 12.5 (3.45-25.2)    |

**A. Conceptual framework.** Associations between exposure (US vs. Japan), outcome (CVD events), and mediators. Measured confounders include age, sex, baseline smoking status, eGFR, ln(UACR), diabetes mellitus, history of any CVD, systolic blood pressure, obesity category, number of classes of antihypertensive agents, hemoglobin corrected calcium, ln(total PTH), active vitamin D supplementation, and ln(25(OH) vitamin D) **B. Directed acyclic graph.** M represents mediators and XM represents interaction between region and mediators. CDE, controlled direct effects; RIE, reference interaction effects; MIE, mediated interaction effects; PNIE, pure natural indirect effects.

**Supplementary Figure S2.** Distribution of factors associated with increased left ventricular mass index (LVMI) compared among ethnic groups across levels of estimated glomerular filtration rate (eGFR)

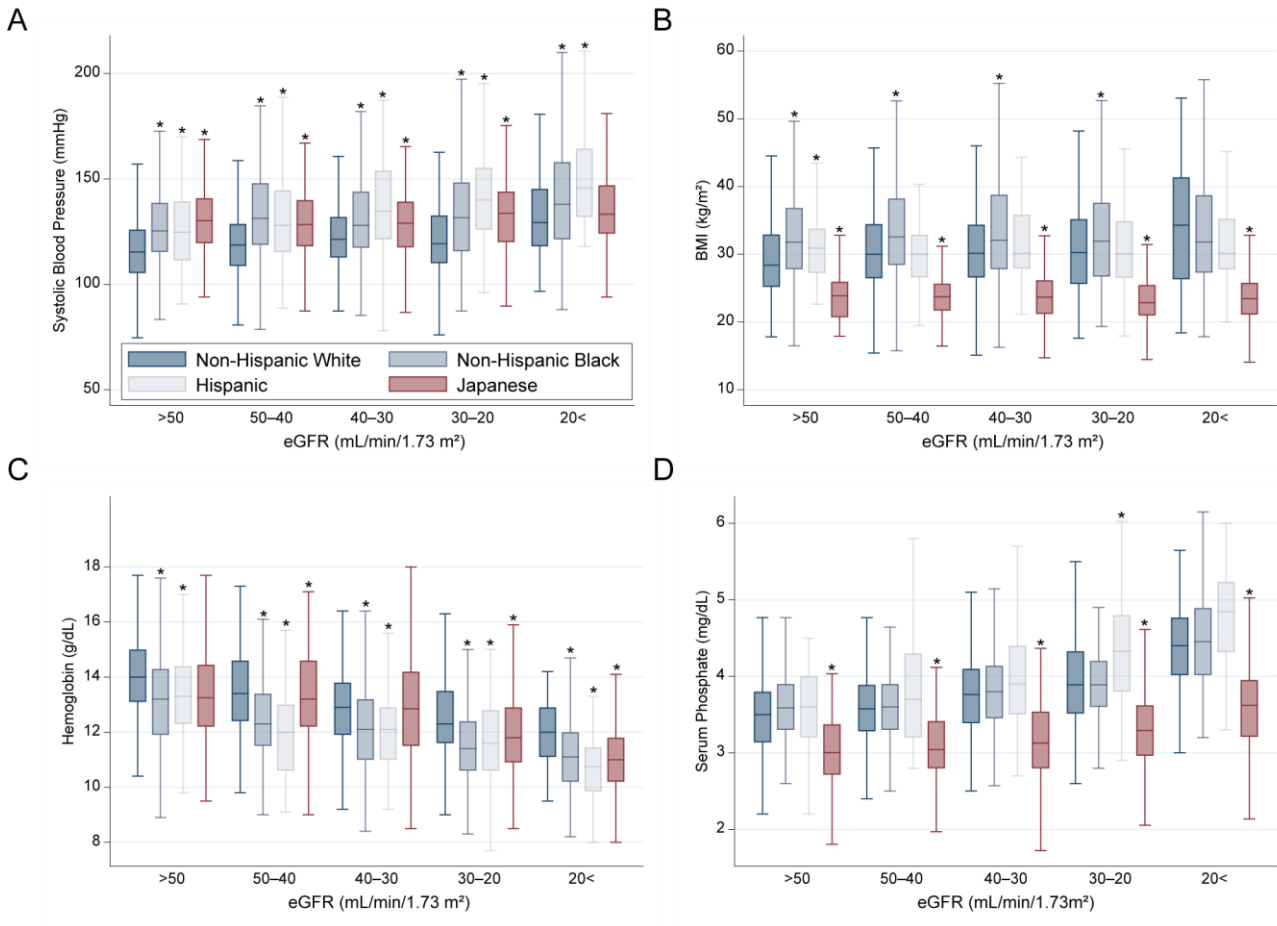

**A.** Systolic blood pressure. **B.** Body mass index. **C.** Hemoglobin. **D.** Serum phosphate in the CRIC and CKD-JAC studies. Comparisons among ethnic groups were performed with the Dunnett test using non-Hispanic White as a reference (\* $P < 0.05$ ). LVMI, left ventricular mass index; BMI, body mass index; eGFR, estimated glomerular filtration rate.

**Supplementary Figure S3.** Association between BMI and asymmetric septal hypertrophy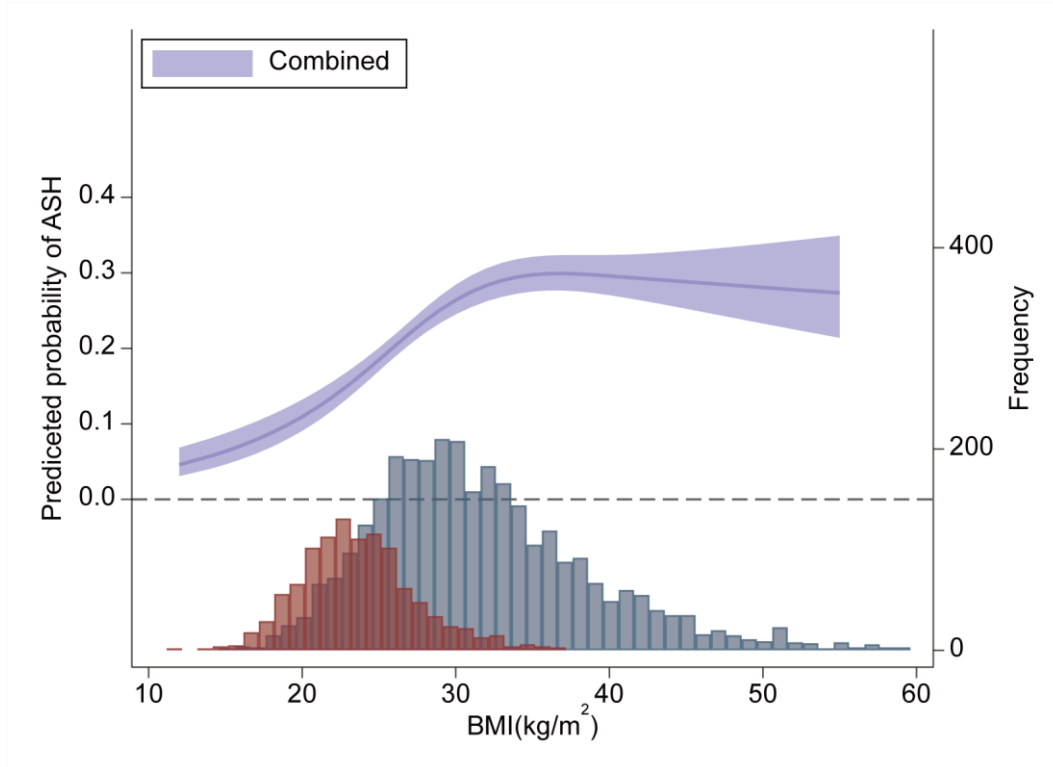

Restricted cubic spline analysis to examine the predicted probability of ASH across levels of BMI in the combined cohort. ASH was defined as a septal-to-posterior wall thickness ratio  $\geq 1.3$ . BMI, body mass index; ASH, asymmetric septal hypertrophy

**Supplementary Figure S4.** Unadjusted and adjusted event-free survival of adverse events (Chronic Renal Insufficiency Cohort [CRIC] vs. Chronic Kidney Disease Japan Cohort [CKD-JAC])

**A. ASCVD**  
(Unadjusted)

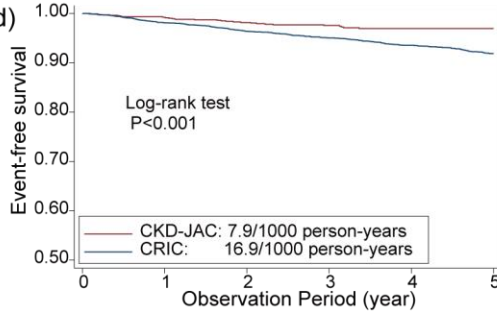

**B. ASCVD**  
(Adjusted)

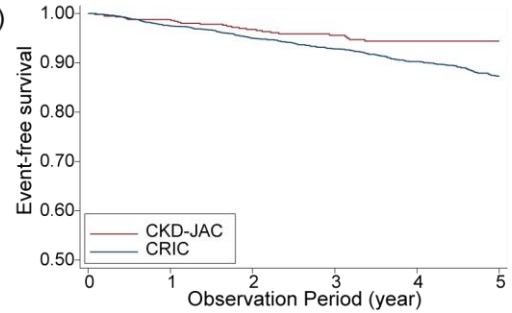

**C. CHF**  
(Unadjusted)

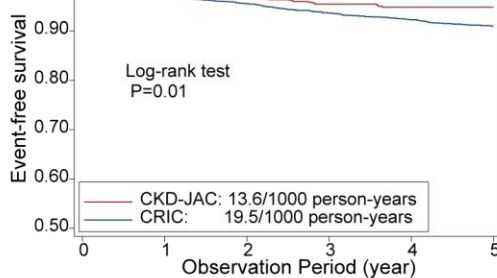

**D. CHF**  
(Adjusted)

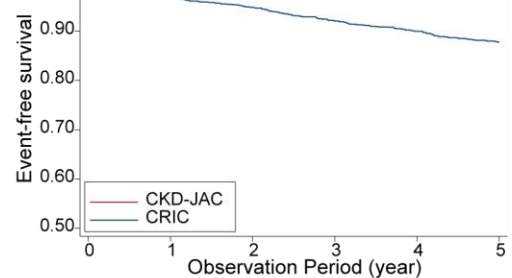

**E. Death**  
(Unadjusted)

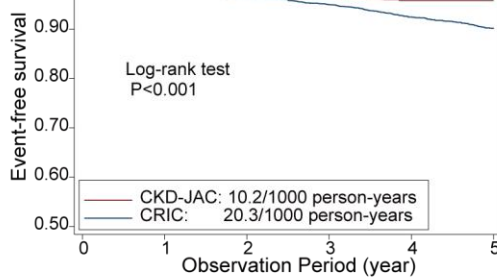

**F. Death**  
(Adjusted)

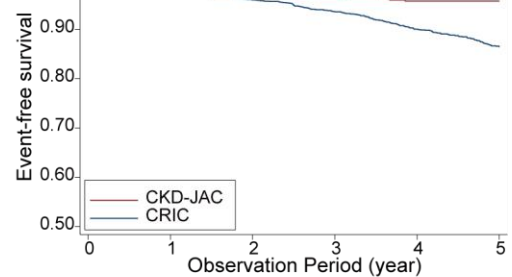

**G. Kidney failure**  
(Unadjusted)

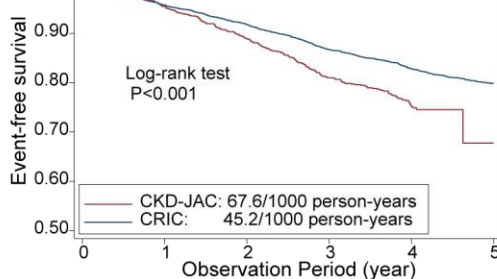

**H. Kidney failure**  
(Adjusted)

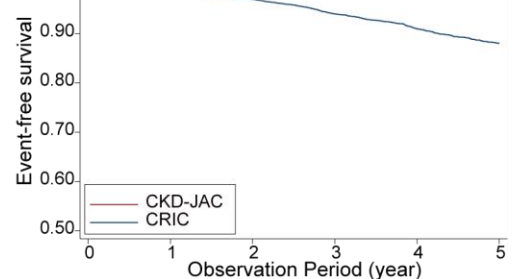

Unadjusted and adjusted event-free survival for ASCVD event (**A, B**), CHF (**C, D**), all-cause death (**E, F**), and kidney failure (**G, H**). A multivariable adjustment was made for age, sex, DM, eGFR, and log-transformed UACR. CRIC, chronic renal insufficiency cohort; CKD-JAC, chronic kidney disease Japan cohort; CVD, cardiovascular disease. ASCVD, atherosclerotic cardiovascular disease; UACR, urinary albumin-creatinine ratio.

## Supplementary Figure S5. Unadjusted and adjusted event-free survival of adverse events (4 different race-ethnic groups)

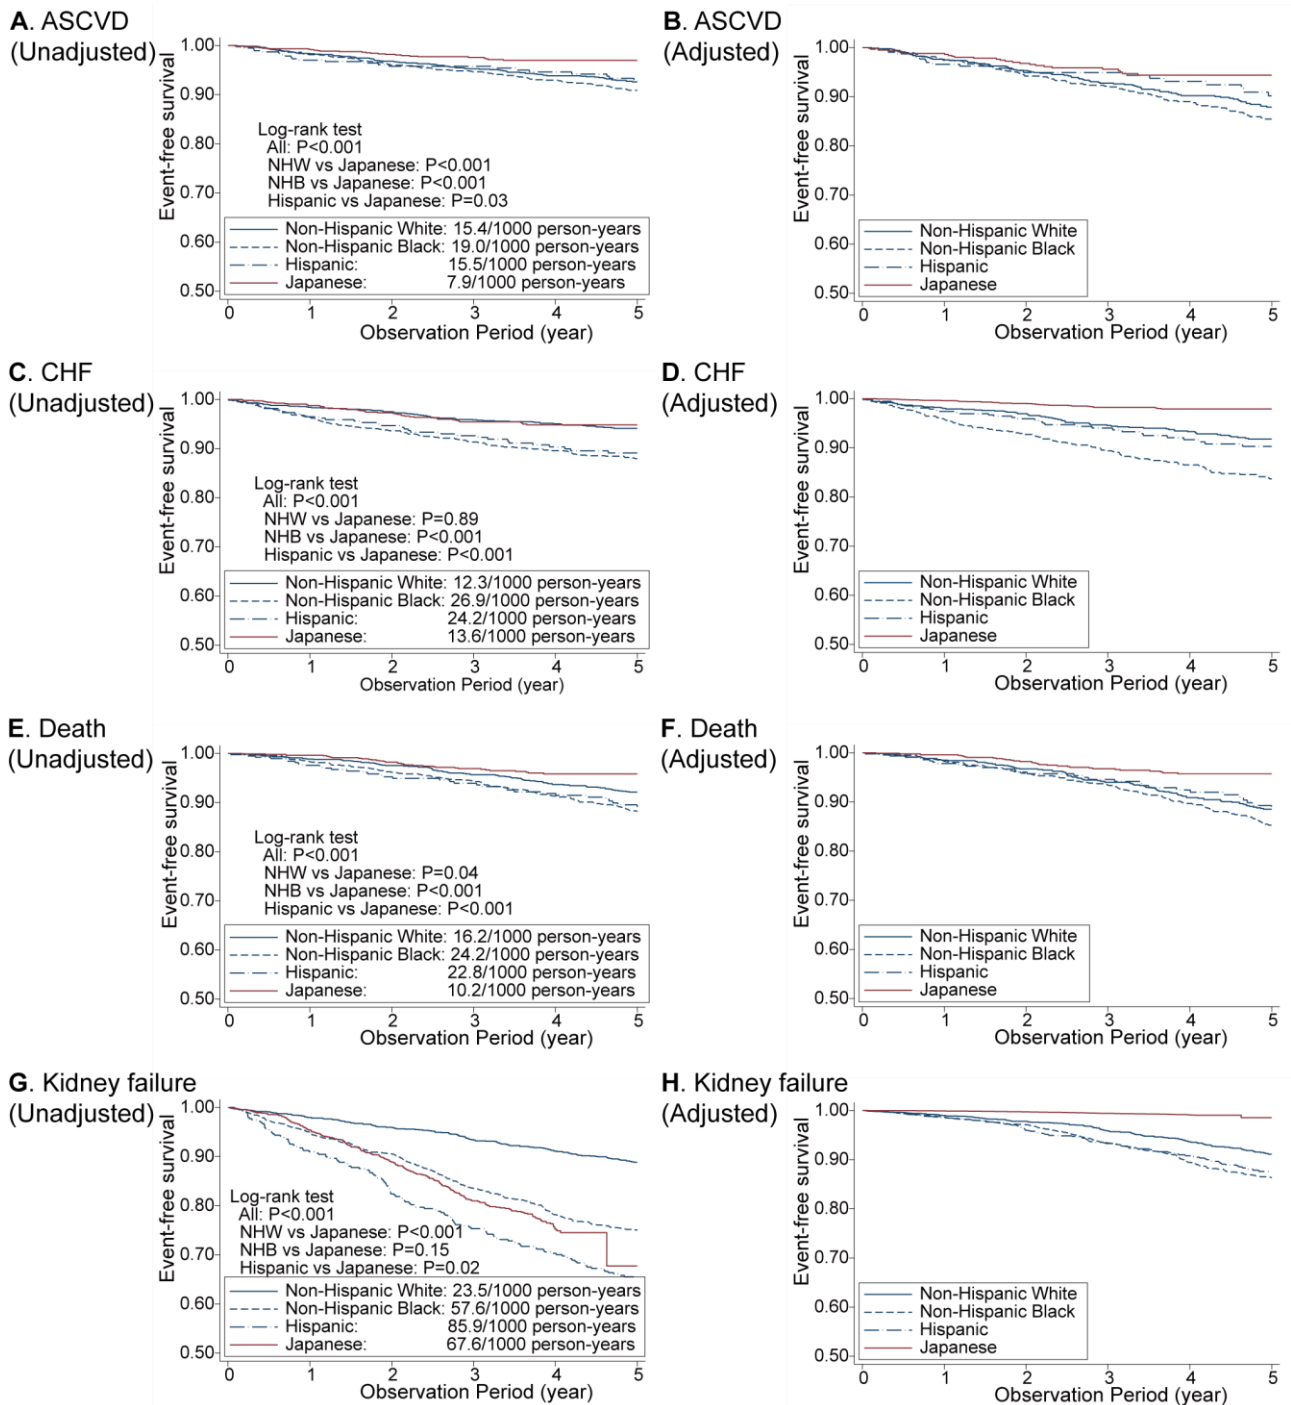

Unadjusted and adjusted event-free survival for ASCVD event (**A, B**), CHF (**C, D**), all-cause death (**E, F**), and kidney failure (**G, H**). A multivariable adjustment was made for age, sex, DM, eGFR, and log-transformed UACR. CVD, cardiovascular disease; ASCVD, atherosclerotic cardiovascular disease; NHW, non-Hispanic White; NHB, non-Hispanic Black; UACR, urinary albumin-creatinine ratio.
